# Supplementary material for: Artificial Neural Network for Discrimination and Classification of Tropical Soybean Genotypes of Different Relative Maturity Groups
Source: Front Plant Sci. 2022 Jul 12;13:814046. doi: 10.3389/fpls.2022.814046 (PMC9328155; doi:10.3389/fpls.2022.814046)
Supplement: Supplementary Table — Dataset collected from soybean progenies belonging to different relative maturity groups, during three agricultural years of evaluation. [file Table_1.xlsx]

## Sheet: Genealogia
year	pop	plot	ndf	ndm	cycle	aiv	apm	ac	va	pg
2018	1	1	32	144	159	25	98	2	3.5	16.1
2018	1	1	32	144	159	11	96	2	3.5	20.3
2018	1	1	32	144	159	14	96	2	3.5	22
2018	1	1	32	144	159	13	118	2	3.5	25.4
2018	1	1	32	144	159	24	97	2	3.5	26.1
2019	1	1	30	113	128	14	87	1	5	18.3
2019	1	1	30	113	128	11	78	1	5	23.5
2019	1	1	30	113	128	10	101	1	5	24
2019	1	1	30	113	128	12	78	1	5	40.2
2019	1	1	30	113	128	9	80	1	5	46.1
2020	1	1	47	100	115	20	52	1	2.5	17.9
2020	1	1	47	100	115	11	38	1	2.5	23.5
2020	1	1	47	100	115	9	45	1	2.5	23.7
2020	1	1	47	100	115	10	76	1	2.5	80.8
2018	2	1	30	73	88	11	57	1	2.5	6.7
2018	2	1	30	73	88	11	64	1	2.5	12.1
2018	2	1	30	73	88	9	54	1	2.5	12.6
2018	2	1	30	73	88	9	60	1	2.5	17.9
2018	2	1	30	73	88	13	70	1	2.5	32.8
2019	2	1	30	103	118	19	85	1.5	2.5	9.9
2019	2	1	30	103	118	18	83	1.5	2.5	11.2
2019	2	1	30	103	118	9	85	1.5	2.5	14.7
2019	2	1	30	103	118	10	79	1.5	2.5	15.3
2019	2	1	30	103	118	11	80	1.5	2.5	24.1
2020	2	1	38	104	119	18	90	1.5	4	16.6
2020	2	1	38	104	119	9	100	1.5	4	38.5
2020	2	1	38	104	119	16	81	1.5	4	60.3
2020	2	1	38	104	119	19	93	1.5	4	80.9
2020	2	1	38	104	119	14	91	1.5	4	95.9
2019	3	1	55	108	123	14	50	1	5	42.8
2019	3	1	55	108	123	7	75	1	5	50.4
2019	3	1	55	108	123	8	70	1	5	63.5
2019	3	1	55	108	123	9	92	1	5	78.2
2019	3	1	55	108	123	12	67	1	5	81.9
2020	3	1	54	113	128	11	100	2	3.5	17.2
2020	3	1	54	113	128	14	90	2	3.5	24.5
2020	3	1	54	113	128	12	83	2	3.5	30.8
2020	3	1	54	113	128	12	83	2	3.5	32
2020	3	1	54	113	128	12	91	2	3.5	36.9
2018	1	2	33	104	119	13	80	2	3	9.7
2018	1	2	33	104	119	13	79	2	3	12.4
2018	1	2	33	104	119	13	80	2	3	13.9
2018	1	2	33	104	119	15	80	2	3	18.2
2018	1	2	33	104	119	17	84	2	3	22.4
2018	7	2	30	73	88	8	52	1	2.5	6.6
2018	7	2	30	73	88	11	48	1	2.5	7.2
2018	7	2	30	73	88	12	57	1	2.5	8.5
2018	7	2	30	73	88	11	52	1	2.5	13
2018	7	2	30	73	88	9	67	1	2.5	15.4
2019	7	2	30	95	110	14	82	2.5	2	8.8
2019	7	2	30	95	110	13	68	2.5	2	10.6
2019	7	2	30	95	110	12	68	2.5	2	11.7
2019	7	2	30	95	110	9	64	2.5	2	12.1
2019	7	2	30	95	110	11	80	2.5	2	14.6
2020	7	2	31	89	104	7	49	1	2.5	6.7
2020	7	2	31	89	104	5	58	1	2.5	11.8
2020	7	2	31	89	104	7	56	1	2.5	14.1
2020	7	2	31	89	104	6	58	1	2.5	20.7
2020	7	2	31	89	104	8	55	1	2.5	21.2
2019	8	2	55	113	128	10	51	1	4	58.7
2020	8	2	50	82	97	13	84	2	3.5	18
2020	8	2	50	82	97	15	73	2	3.5	26.6
2020	8	2	50	82	97	14	71	2	3.5	37.8
2020	8	2	50	82	97	11	75	2	3.5	38.1
2020	8	2	50	82	97	9	74	2	3.5	39.7
2018	2	3	35	102	117	15	71	1	3.5	8.3
2018	2	3	35	102	117	10	26	1	3.5	10.2
2018	2	3	35	102	117	12	77	1	3.5	18.2
2018	2	3	35	102	117	13	76	1	3.5	24.4
2018	2	3	35	102	117	12	78	1	3.5	25.2
2019	2	3	33	104	119	8	95	3	3	22.4
2019	2	3	33	104	119	11	99	3	3	33.8
2019	2	3	33	104	119	19	104	3	3	37.2
2019	2	3	33	104	119	12	101	3	3	47.2
2019	2	3	33	104	119	6	96	3	3	89.4
2020	2	3	37	106	121	10	98	1.5	4	35.4
2020	2	3	37	106	121	11	98	1.5	4	40.8
2020	2	3	37	106	121	14	101	1.5	4	42.3
2020	2	3	37	106	121	17	103	1.5	4	50.2
2020	2	3	37	106	121	9	96	1.5	4	71.6
2019	3	3	55	108	123	12	66	1	5	67.8
2019	3	3	55	108	123	6	65	1	5	74.1
2019	3	3	55	108	123	14	105	1	5	77.5
2019	3	3	55	108	123	13	89	1	5	80.5
2019	3	3	55	108	123	9	85	1	5	102.7
2020	3	3	71	105	120	7	91	2.5	3.5	23
2020	3	3	71	105	120	8	108	2.5	3.5	32.1
2020	3	3	71	105	120	17	97	2.5	3.5	35.9
2020	3	3	71	105	120	8	97	2.5	3.5	39.7
2020	3	3	71	105	120	11	92	2.5	3.5	39.8
2019	4	3	71	132	147	13	118	1.5	3.5	8.5
2019	4	3	71	132	147	13	133	1.5	3.5	9.5
2019	4	3	71	132	147	21	138	1.5	3.5	16
2019	4	3	71	132	147	20	128	1.5	3.5	16.6
2019	4	3	71	132	147	12	116	1.5	3.5	30.2
2020	4	3	75	139	154	16	103	2.5	2.5	11.5
2020	4	3	75	139	154	10	56	2.5	2.5	42.5
2018	1	4	35	142	157	12	96	1.5	3	9.5
2018	1	4	35	142	157	24	99	1.5	3	13.5
2018	1	4	35	142	157	22	86	1.5	3	13.7
2018	1	4	35	142	157	15	109	1.5	3	16.6
2018	1	4	35	142	157	14	75	1.5	3	20.3
2020	1	4	36	90	105	8	61	2.5	2.5	19.8
2020	1	4	36	90	105	8	65	2.5	2.5	25.3
2020	1	4	36	90	105	12	85	2.5	2.5	27.7
2020	1	4	36	90	105	10	91	2.5	2.5	63.7
2020	1	4	36	90	105	12	109	2.5	2.5	103.1
2018	2	4	32	104	119	13	70	1.5	2	7.6
2018	2	4	32	104	119	14	79	1.5	2	8.7
2018	2	4	32	104	119	10	60	1.5	2	13.5
2018	2	4	32	104	119	14	73	1.5	2	14.6
2018	2	4	32	104	119	12	68	1.5	2	30
2019	2	4	31	104	119	16	99	2	3.5	14.8
2019	2	4	31	104	119	12	93	2	3.5	20
2019	2	4	31	104	119	12	106	2	3.5	20.5
2019	2	4	31	104	119	14	97	2	3.5	39.1
2019	2	4	31	104	119	14	97	2	3.5	40.4
2020	2	4	36	95	110	8	90	1.5	3.5	19.3
2020	2	4	36	95	110	5	99	1.5	3.5	23.9
2020	2	4	36	95	110	8	101	1.5	3.5	27.4
2020	2	4	36	95	110	12	97	1.5	3.5	34
2020	2	4	36	95	110	10	94	1.5	3.5	42.6
2019	3	4	58	108	123	19	106	1	5	31.1
2019	3	4	58	108	123	10	99	1	5	42.6
2019	3	4	58	108	123	8	106	1	5	44.7
2019	3	4	58	108	123	15	110	1	5	55.2
2019	3	4	58	108	123	7	93	1	5	99.2
2020	3	4	52	110	125	14	103	3.5	2	16
2020	3	4	52	110	125	15	31	3.5	2	24.5
2020	3	4	52	110	125	14	92	3.5	2	25.2
2020	3	4	52	110	125	8	101	3.5	2	38.4
2020	3	4	52	110	125	12	106	3.5	2	40.5
2018	1	5	50	118	133	19	108	2	3	12.2
2018	1	5	50	118	133	19	86	2	3	12.9
2018	1	5	50	118	133	14	110	2	3	15.2
2018	1	5	50	118	133	13	102	2	3	22
2018	1	5	50	118	133	13	93	2	3	26.4
2019	1	5	32	111	126	13	111	2	4	14.2
2019	1	5	32	111	126	9	128	2	4	16.2
2019	1	5	32	111	126	14	89	2	4	20.3
2019	1	5	32	111	126	9	88	2	4	31.6
2019	1	5	32	111	126	12	126	2	4	37.9
2020	1	5	43	98	113	11	90	1	3.5	24.1
2020	1	5	43	98	113	9	80	1	3.5	32.2
2020	1	5	43	98	113	16	84	1	3.5	32.9
2020	1	5	43	98	113	18	93	1	3.5	52.8
2020	1	5	43	98	113	7	57	1	3.5	67.5
2018	2	5	32	76	91	10	61	1.5	3	13.6
2018	2	5	32	76	91	10	64	1.5	3	15.2
2018	2	5	32	76	91	12	67	1.5	3	16.4
2018	2	5	32	76	91	12	77	1.5	3	16.4
2018	2	5	32	76	91	10	66	1.5	3	20.1
2019	2	5	32	106	121	23	93	3.5	2	10.4
2019	2	5	32	106	121	18	94	3.5	2	15.7
2019	2	5	32	106	121	7	88	3.5	2	16.3
2019	2	5	32	106	121	11	67	3.5	2	22
2019	2	5	32	106	121	17	97	3.5	2	49.8
2020	2	5	36	101	116	9	99	3	2.5	13.6
2020	2	5	36	101	116	16	111	3	2.5	20
2020	2	5	36	101	116	12	102	3	2.5	40.2
2020	2	5	36	101	116	12	79	3	2.5	42.6
2020	2	5	36	101	116	12	113	3	2.5	88.5
2019	3	5	53	108	123	13	75	1	5	48
2019	3	5	53	108	123	10	100	1	5	55.5
2019	3	5	53	108	123	12	84	1	5	70.7
2019	3	5	53	108	123	16	94	1	5	94
2019	3	5	53	108	123	17	80	1	5	123.1
2020	3	5	64	93	108	13	90	4	2	29
2020	3	5	64	93	108	11	92	4	2	29.7
2020	3	5	64	93	108	12	111	4	2	33.9
2020	3	5	64	93	108	10	106	4	2	34.2
2020	3	5	64	93	108	11	98	4	2	37.3
2018	1	6	39	116	131	17	88	2	3.5	11.1
2018	1	6	39	116	131	18	107	2	3.5	14.7
2018	1	6	39	116	131	14	99	2	3.5	16.5
2018	1	6	39	116	131	19	93	2	3.5	18
2018	1	6	39	116	131	22	111	2	3.5	19.2
2019	1	6	30	132	147	14	100	1	4	6.8
2019	1	6	30	132	147	11	87	1	4	28.5
2019	1	6	30	132	147	14	121	1	4	30.2
2019	1	6	30	132	147	17	97	1	4	44
2019	1	6	30	132	147	12	99	1	4	59.2
2020	1	6	49	110	125	9	83	2	2.5	32.7
2020	1	6	49	110	125	16	117	2	2.5	37.5
2020	1	6	49	110	125	13	97	2	2.5	40.5
2020	1	6	49	110	125	12	120	2	2.5	50.1
2020	1	6	49	110	125	11	98	2	2.5	66
2018	2	6	35	74	89	18	81	1.5	4	7.2
2018	2	6	35	74	89	26	91	1.5	4	11.5
2018	2	6	35	74	89	19	86	1.5	4	12.3
2018	2	6	35	74	89	14	84	1.5	4	16.5
2018	2	6	35	74	89	14	84	1.5	4	24.4
2019	2	6	39	116	131	20	90	1	4.5	12.9
2019	2	6	39	116	131	15	84	1	4.5	13.9
2019	2	6	39	116	131	10	92	1	4.5	14.8
2019	2	6	39	116	131	15	80	1	4.5	17.8
2020	2	6	34	99	114	19	85	1.5	4.5	22.9
2020	2	6	34	99	114	19	85	1.5	4.5	23.4
2020	2	6	34	99	114	12	96	1.5	4.5	23.7
2020	2	6	34	99	114	9	94	1.5	4.5	30.4
2020	2	6	34	99	114	11	83	1.5	4.5	31.4
2019	3	6	52	113	128	18	91	1	5	30.3
2019	3	6	52	113	128	15	78	1	5	50.8
2019	3	6	52	113	128	14	105	1	5	56.6
2019	3	6	52	113	128	9	82	1	5	58
2019	3	6	52	113	128	12	102	1	5	62.1
2020	3	6	49	84	99	15	73	1.5	3	30.4
2020	3	6	49	84	99	6	71	1.5	3	34
2020	3	6	49	84	99	6	86	1.5	3	35.9
2020	3	6	49	84	99	6	74	1.5	3	36.2
2020	3	6	49	84	99	13	91	1.5	3	89
2018	1	7	35	118	133	16	108	2	2.5	11.2
2018	1	7	35	118	133	17	83	2	2.5	13.8
2018	1	7	35	118	133	12	89	2	2.5	15.6
2018	1	7	35	118	133	16	101	2	2.5	19.6
2019	1	7	32	130	145	19	112	1	4	12.5
2019	1	7	32	130	145	15	125	1	4	17
2019	1	7	32	130	145	8	89	1	4	34.1
2019	1	7	32	130	145	7	87	1	4	40
2019	1	7	32	130	145	10	123	1	4	55
2020	1	7	38	106	121	9	76	3.5	2	9.8
2020	1	7	38	106	121	6	124	3.5	2	12
2020	1	7	38	106	121	20	118	3.5	2	15.2
2020	1	7	38	106	121	17	113	3.5	2	18.9
2020	1	7	38	106	121	13	125	3.5	2	21.9
2018	2	7	32	87	102	11	70	1.5	3	6.8
2018	2	7	32	87	102	15	80	1.5	3	11.5
2018	2	7	32	87	102	10	84	1.5	3	16.8
2018	2	7	32	87	102	11	80	1.5	3	17.3
2018	2	7	32	87	102	10	77	1.5	3	31.2
2019	2	7	31	108	123	15	85	1.5	3	10.8
2019	2	7	31	108	123	17	80	1.5	3	12.3
2019	2	7	31	108	123	14	85	1.5	3	18.6
2019	2	7	31	108	123	12	86	1.5	3	21
2019	2	7	31	108	123	14	97	1.5	3	36.2
2020	2	7	36	103	118	11	89	2	4	23.3
2020	2	7	36	103	118	12	101	2	4	38.8
2020	2	7	36	103	118	15	96	2	4	39.8
2020	2	7	36	103	118	13	101	2	4	41.7
2020	2	7	36	103	118	11	95	2	4	49.6
2019	3	7	53	113	128	10	94	1	4.5	16.6
2019	3	7	53	113	128	15	100	1	4.5	23.8
2019	3	7	53	113	128	11	103	1	4.5	32.4
2019	3	7	53	113	128	16	102	1	4.5	33.2
2019	3	7	53	113	128	18	103	1	4.5	49.1
2020	3	7	51	80	95	12	81	2.5	3	11.4
2020	3	7	51	80	95	13	81	2.5	3	21.6
2020	3	7	51	80	95	12	79	2.5	3	25.1
2020	3	7	51	80	95	10	75	2.5	3	28.1
2020	3	7	51	80	95	13	76	2.5	3	28.9
2018	1	8	32	116	131	12	66	1.5	3	14.2
2018	1	8	32	116	131	13	78	1.5	3	15
2018	1	8	32	116	131	13	81	1.5	3	21.4
2019	1	8	39	123	138	13	98	1	4.5	34.3
2019	1	8	39	123	138	14	87	1	4.5	36.4
2019	1	8	39	123	138	7	103	1	4.5	37
2019	1	8	39	123	138	13	103	1	4.5	40.5
2019	1	8	39	123	138	10	93	1	4.5	51.5
2020	1	8	38	106	121	12	118	2.5	4	13.8
2020	1	8	38	106	121	17	119	2.5	4	16.2
2020	1	8	38	106	121	11	120	2.5	4	16.8
2020	1	8	38	106	121	17	124	2.5	4	38.7
2020	1	8	38	106	121	16	115	2.5	4	51.9
2018	2	8	35	100	115	12	67	1.5	2.5	15.7
2018	2	8	35	100	115	17	69	1.5	2.5	16.1
2018	2	8	35	100	115	15	74	1.5	2.5	17.3
2018	2	8	35	100	115	12	68	1.5	2.5	20.5
2018	2	8	35	100	115	8	65	1.5	2.5	40.1
2019	2	8	29	106	121	13	95	2	3.5	15.5
2019	2	8	29	106	121	13	86	2	3.5	18
2019	2	8	29	106	121	14	106	2	3.5	21.6
2019	2	8	29	106	121	10	88	2	3.5	27.3
2019	2	8	29	106	121	12	93	2	3.5	36.8
2020	2	8	37	103	118	17	100	2	3.5	28.3
2020	2	8	37	103	118	16	101	2	3.5	36.5
2020	2	8	37	103	118	17	107	2	3.5	43.3
2020	2	8	37	103	118	12	101	2	3.5	58
2020	2	8	37	103	118	12	96	2	3.5	65.1
2019	4	8	64	138	153	15	120	1.5	4	13.3
2019	4	8	64	138	153	11	124	1.5	4	14.2
2019	4	8	64	138	153	12	121	1.5	4	19
2019	4	8	64	138	153	15	113	1.5	4	21.3
2019	4	8	64	138	153	16	111	1.5	4	23.1
2020	4	8	71	120	135	16	133	2	5	9.6
2020	4	8	71	120	135	18	128	2	5	16.9
2020	4	8	71	120	135	13	139	2	5	17.5
2020	4	8	71	120	135	14	139	2	5	19.7
2020	4	8	71	120	135	14	130	2	5	33.8
2018	1	9	32	120	135	16	92	3	2.5	9.8
2018	1	9	32	120	135	16	123	3	2.5	14.7
2018	1	9	32	120	135	11	93	3	2.5	37.4
2019	1	9	41	123	138	11	102	2	3.5	25.8
2019	1	9	41	123	138	16	74	2	3.5	47.1
2019	1	9	41	123	138	15	85	2	3.5	54.7
2019	1	9	41	123	138	11	90	2	3.5	60.1
2019	1	9	41	123	138	11	85	2	3.5	78
2020	1	9	44	106	121	17	107	2.5	4	18.5
2020	1	9	44	106	121	20	93	2.5	4	32.8
2020	1	9	44	106	121	10	108	2.5	4	45
2020	1	9	44	106	121	10	113	2.5	4	60
2020	1	9	44	106	121	10	95	2.5	4	81
2018	2	9	32	76	91	6	59	1.5	3	16.9
2018	2	9	32	76	91	5	71	1.5	3	23.4
2018	2	9	32	76	91	8	67	1.5	3	23.6
2018	2	9	32	76	91	5	66	1.5	3	24.6
2018	2	9	32	76	91	10	71	1.5	3	25.4
2019	2	9	34	106	121	10	89	2	3.5	19.5
2019	2	9	34	106	121	15	87	2	3.5	24.9
2019	2	9	34	106	121	16	89	2	3.5	26.1
2019	2	9	34	106	121	14	89	2	3.5	30.3
2019	2	9	34	106	121	11	91	2	3.5	49.5
2020	2	9	36	99	114	16	94	1.5	4	20.2
2020	2	9	36	99	114	18	103	1.5	4	25.5
2020	2	9	36	99	114	15	101	1.5	4	30.8
2020	2	9	36	99	114	16	92	1.5	4	32.6
2020	2	9	36	99	114	16	91	1.5	4	40.8
2019	3	9	55	113	128	13	90	1	4.5	30.3
2019	3	9	55	113	128	8	102	1	4.5	30.3
2019	3	9	55	113	128	9	90	1	4.5	43.3
2019	3	9	55	113	128	11	114	1	4.5	47.2
2019	3	9	55	113	128	12	121	1	4.5	67.8
2020	3	9	57	96	111	12	114	3	3.5	16
2020	3	9	57	96	111	19	112	3	3.5	18.5
2020	3	9	57	96	111	10	110	3	3.5	19.5
2020	3	9	57	96	111	12	107	3	3.5	25.4
2020	3	9	57	96	111	10	95	3	3.5	30.4
2018	1	10	32	116	131	19	88	2	3	6.3
2018	1	10	32	116	131	18	105	2	3	17.8
2018	1	10	32	116	131	19	94	2	3	18
2018	1	10	32	116	131	14	94	2	3	19.3
2018	1	10	32	116	131	13	100	2	3	21.5
2019	1	10	43	123	138	22	102	1.5	3.5	15.2
2019	1	10	43	123	138	14	123	1.5	3.5	17.4
2019	1	10	43	123	138	7	116	1.5	3.5	37
2019	1	10	43	123	138	14	120	1.5	3.5	41.9
2019	1	10	43	123	138	10	105	1.5	3.5	43.7
2020	1	10	38	106	121	6	60	4	1.5	10.7
2020	1	10	38	106	121	10	96	4	1.5	17.5
2020	1	10	38	106	121	7	59	4	1.5	24.8
2020	1	10	38	106	121	8	59	4	1.5	42.7
2020	1	10	38	106	121	12	105	4	1.5	60.7
2018	2	10	35	98	113	18	64	1	3.5	5.8
2018	2	10	35	98	113	13	64	1	3.5	8.5
2018	2	10	35	98	113	18	69	1	3.5	9.5
2018	2	10	35	98	113	13	69	1	3.5	13.3
2018	2	10	35	98	113	12	69	1	3.5	13.8
2019	2	10	39	113	128	12	102	4	2.5	24.9
2019	2	10	39	113	128	8	103	4	2.5	31.9
2019	2	10	39	113	128	15	102	4	2.5	33.8
2019	2	10	39	113	128	9	100	4	2.5	36.8
2019	2	10	39	113	128	17	111	4	2.5	42.7
2020	2	10	37	103	118	19	94	1.5	4	18.7
2020	2	10	37	103	118	8	88	1.5	4	24.9
2020	2	10	37	103	118	13	88	1.5	4	26.9
2020	2	10	37	103	118	12	95	1.5	4	31.2
2020	2	10	37	103	118	17	103	1.5	4	63
2019	3	10	53	115	130	14	104	1	5	39.6
2019	3	10	53	115	130	16	108	1	5	41.4
2019	3	10	53	115	130	18	107	1	5	55.3
2019	3	10	53	115	130	11	111	1	5	69
2019	3	10	53	115	130	11	91	1	5	71.5
2020	3	10	54	88	103	7	78	4	2.5	16.3
2020	3	10	54	88	103	14	89	4	2.5	16.5
2020	3	10	54	88	103	13	90	4	2.5	29.8
2020	3	10	54	88	103	9	76	4	2.5	67
2020	3	10	54	88	103	11	85	4	2.5	76.6
2018	2	11	35	98	113	16	80	1	3.5	8.2
2018	2	11	35	98	113	18	82	1	3.5	11.9
2018	2	11	35	98	113	14	70	1	3.5	23.3
2018	2	11	35	98	113	16	82	1	3.5	24
2018	2	11	35	98	113	13	76	1	3.5	35.3
2019	2	11	37	108	123	14	88	1.5	3.5	13.7
2019	2	11	37	108	123	19	89	1.5	3.5	16.1
2019	2	11	37	108	123	19	93	1.5	3.5	16.1
2019	2	11	37	108	123	13	88	1.5	3.5	20.9
2019	2	11	37	108	123	12	87	1.5	3.5	41.5
2020	2	11	40	104	119	11	112	1.5	4	33.9
2020	2	11	40	104	119	9	96	1.5	4	37.4
2020	2	11	40	104	119	12	110	1.5	4	60.6
2020	2	11	40	104	119	16	95	1.5	4	65.2
2020	2	11	40	104	119	13	108	1.5	4	104.9
2019	3	11	52	108	123	10	68	1	4	38.6
2019	3	11	52	108	123	9	64	1	4	41.1
2019	3	11	52	108	123	13	68	1	4	63.1
2019	3	11	52	108	123	14	68	1	4	73.4
2019	3	11	52	108	123	8	58	1	4	84.9
2020	3	11	50	83	98	12	93	1.5	3.5	31.1
2020	3	11	50	83	98	12	89	1.5	3.5	42.7
2020	3	11	50	83	98	10	77	1.5	3.5	50.7
2020	3	11	50	83	98	12	84	1.5	3.5	51.6
2020	3	11	50	83	98	10	84	1.5	3.5	51.7
2018	10	11	35	76	91	26	68	3	2.5	4.2
2018	10	11	35	76	91	20	73	3	2.5	7.5
2018	10	11	35	76	91	20	73	3	2.5	9.7
2018	10	11	35	76	91	20	77	3	2.5	11.3
2018	10	11	35	76	91	20	76	3	2.5	12.4
2019	10	11	30	96	111	16	76	2	4	13.8
2019	10	11	30	96	111	7	89	2	4	14.4
2019	10	11	30	96	111	16	84	2	4	28.9
2019	10	11	30	96	111	12	74	2	4	44
2019	10	11	30	96	111	10	80	2	4	63.4
2020	10	11	36	101	116	12	76	1.5	3.5	19.7
2020	10	11	36	101	116	7	65	1.5	3.5	21.4
2020	10	11	36	101	116	8	68	1.5	3.5	48.7
2020	10	11	36	101	116	8	70	1.5	3.5	53.1
2020	10	11	36	101	116	12	68	1.5	3.5	77.6
2018	1	12	32	115	130	17	92	1	3.5	12.4
2018	1	12	32	115	130	18	91	1	3.5	14.2
2018	1	12	32	115	130	18	109	1	3.5	15.4
2018	1	12	32	115	130	17	96	1	3.5	22.9
2018	1	12	32	115	130	15	95	1	3.5	27.2
2019	1	12	51	104	119	10	118	1.5	3.5	7.4
2019	1	12	51	104	119	12	118	1.5	3.5	9
2019	1	12	51	104	119	9	133	1.5	3.5	24.2
2019	1	12	51	104	119	11	110	1.5	3.5	44.1
2019	1	12	51	104	119	14	133	1.5	3.5	59.8
2020	1	12	44	106	121	11	80	1	2.5	17.2
2020	1	12	44	106	121	7	51	1	2.5	25.8
2018	2	12	32	100	115	18	76	1.5	2.5	7.1
2018	2	12	32	100	115	15	80	1.5	2.5	13
2018	2	12	32	100	115	13	73	1.5	2.5	14.8
2018	2	12	32	100	115	13	80	1.5	2.5	18.7
2018	2	12	32	100	115	12	79	1.5	2.5	20.4
2019	2	12	30	106	121	11	83	1.5	4	12.6
2019	2	12	30	106	121	11	81	1.5	4	13.9
2019	2	12	30	106	121	12	89	1.5	4	14.6
2019	2	12	30	106	121	13	90	1.5	4	18.8
2019	2	12	30	106	121	14	83	1.5	4	25.9
2020	2	12	36	103	118	14	106	2	3.5	20.4
2020	2	12	36	103	118	19	103	2	3.5	24.2
2020	2	12	36	103	118	15	113	2	3.5	25.9
2020	2	12	36	103	118	22	111	2	3.5	27.6
2020	2	12	36	103	118	14	105	2	3.5	27.7
2019	3	12	53	113	128	12	106	1	4.5	51.1
2019	3	12	53	113	128	17	97	1	4.5	57.6
2019	3	12	53	113	128	7	101	1	4.5	70.6
2019	3	12	53	113	128	10	87	1	4.5	84.3
2020	3	12	48	81	96	15	80	2	3.5	30.8
2020	3	12	48	81	96	10	98	2	3.5	33.8
2020	3	12	48	81	96	6	93	2	3.5	42.3
2020	3	12	48	81	96	8	104	2	3.5	45.7
2020	3	12	48	81	96	13	91	2	3.5	53.3
2018	1	13	32	142	157	15	86	2.5	3	13.9
2018	1	13	32	142	157	15	100	2.5	3	16.3
2018	1	13	32	142	157	16	100	2.5	3	20
2018	1	13	32	142	157	14	106	2.5	3	23.4
2018	1	13	32	142	157	15	92	2.5	3	36.4
2019	1	13	48	121	136	13	117	1	3.5	21.5
2019	1	13	48	121	136	17	121	1	3.5	64
2019	1	13	48	121	136	14	119	1	3.5	78
2019	1	13	48	121	136	13	127	1	3.5	101.5
2019	1	13	48	121	136	2	55	1	3.5	176.2
2020	1	13	33	97	112	7	105	3	3	24.3
2020	1	13	33	97	112	13	82	3	3	41.4
2020	1	13	33	97	112	13	110	3	3	54.8
2020	1	13	33	97	112	17	103	3	3	65.5
2020	1	13	33	97	112	16	108	3	3	81.2
2018	10	13	32	73	88	23	83	3	3.5	5.8
2018	10	13	32	73	88	13	78	3	3.5	7.4
2018	10	13	32	73	88	14	68	3	3.5	7.7
2018	10	13	32	73	88	13	49	3	3.5	10.1
2018	10	13	32	73	88	18	82	3	3.5	14.2
2019	10	13	32	100	115	13	88	2	3.5	27
2019	10	13	32	100	115	13	85	2	3.5	38.1
2019	10	13	32	100	115	14	81	2	3.5	62.3
2019	10	13	32	100	115	10	90	2	3.5	62.6
2019	10	13	32	100	115	13	93	2	3.5	65.7
2020	10	13	40	75	90	12	93	2	3.5	16.4
2020	10	13	40	75	90	10	92	2	3.5	20.2
2020	10	13	40	75	90	13	102	2	3.5	23.7
2020	10	13	36	97	112	13	96	2.5	3	27
2020	10	13	40	75	90	10	100	2	3.5	33.4
2020	10	13	36	97	112	14	93	2.5	3	35.8
2020	10	13	40	75	90	12	90	2	3.5	41.7
2020	10	13	36	97	112	14	96	2.5	3	46.7
2020	10	13	36	97	112	14	97	2.5	3	47.7
2020	10	13	36	97	112	17	95	2.5	3	74.1
2018	1	14	32	144	159	23	106	1.5	4	11.6
2018	1	14	32	144	159	18	106	1.5	4	15.3
2018	1	14	32	144	159	14	101	1.5	4	16.8
2018	1	14	32	144	159	13	90	1.5	4	17.4
2018	1	14	32	144	159	28	108	1.5	4	18.3
2019	1	14	46	121	136	16	111	2	3.5	38.1
2019	1	14	46	121	136	10	105	2	3.5	54.2
2019	1	14	46	121	136	15	118	2	3.5	56.8
2019	1	14	46	121	136	16	114	2	3.5	61.8
2019	1	14	46	121	136	12	94	2	3.5	64.3
2020	1	14	44	103	118	10	90	4	2.5	25
2020	1	14	44	103	118	17	120	4	2.5	30.9
2020	1	14	44	103	118	10	104	4	2.5	47.3
2020	1	14	44	103	118	10	110	4	2.5	74.4
2020	1	14	44	103	118	15	116	4	2.5	105.7
2018	2	14	34	98	113	12	79	1.5	4	12.7
2018	2	14	34	98	113	13	79	1.5	4	15.8
2018	2	14	34	98	113	13	81	1.5	4	18.9
2018	2	14	34	98	113	13	79	1.5	4	19.3
2018	2	14	34	98	113	11	80	1.5	4	21
2019	2	14	36	108	123	16	95	3.5	3	13.1
2019	2	14	36	108	123	13	89	3.5	3	22.6
2019	2	14	36	108	123	13	78	3.5	3	44
2019	2	14	36	108	123	12	97	3.5	3	77.1
2019	2	14	36	108	123	15	88	3.5	3	92
2020	2	14	36	89	104	13	96	2.5	3	27
2020	2	14	36	89	104	10	99	2.5	3	30
2020	2	14	36	89	104	9	106	2.5	3	41.6
2020	2	14	36	89	104	7	96	2.5	3	45.5
2020	2	14	36	89	104	9	100	2.5	3	60.3
2019	3	14	57	118	133	16	87	1.5	4	33.3
2019	3	14	57	118	133	12	103	1.5	4	33.8
2019	3	14	57	118	133	11	97	1.5	4	47.5
2019	3	14	57	118	133	13	86	1.5	4	70.9
2019	3	14	57	118	133	10	104	1.5	4	89.3
2020	3	14	54	87	102	26	112	2	3.5	18.3
2020	3	14	54	87	102	25	112	2	3.5	28
2020	3	14	54	87	102	10	100	2	3.5	29.4
2020	3	14	54	87	102	10	86	2	3.5	52
2020	3	14	54	87	102	10	86	2	3.5	58.7
2018	1	15	32	116	131	15	109	2.5	3	7.9
2018	1	15	32	116	131	10	87	2.5	3	15.4
2018	1	15	32	116	131	10	120	2.5	3	15.6
2018	1	15	32	116	131	14	89	2.5	3	20.1
2019	1	15	37	123	138	16	101	1.5	4	40
2019	1	15	37	123	138	12	98	1.5	4	43.7
2019	1	15	37	123	138	14	72	1.5	4	67.4
2019	1	15	37	123	138	17	88	1.5	4	74.8
2019	1	15	37	123	138	18	107	1.5	4	83.8
2020	1	15	43	102	117	12	124	4	2	25.4
2020	1	15	43	102	117	16	125	4	2	25.5
2020	1	15	43	102	117	10	124	4	2	28.7
2020	1	15	43	102	117	12	115	4	2	63.9
2020	1	15	43	102	117	15	130	4	2	74.1
2018	2	15	35	104	119	16	72	2	3	5.4
2018	2	15	35	104	119	15	76	2	3	9.7
2018	2	15	35	104	119	18	68	2	3	10.8
2018	2	15	35	104	119	17	82	2	3	16
2018	2	15	35	104	119	16	77	2	3	19.8
2019	2	15	30	108	123	17	100	4	2.5	14.1
2019	2	15	30	108	123	18	106	4	2.5	14.3
2019	2	15	30	108	123	14	102	4	2.5	21.4
2019	2	15	30	108	123	14	99	4	2.5	23.3
2019	2	15	30	108	123	13	92	4	2.5	33.9
2020	2	15	39	100	115	19	103	2.5	3	16.7
2020	2	15	39	100	115	12	96	2.5	3	18.3
2020	2	15	39	100	115	15	95	2.5	3	19.2
2020	2	15	39	100	115	23	117	2.5	3	24.7
2020	2	15	39	100	115	12	90	2.5	3	28.6
2019	3	15	53	123	138	10	98	1	5	16.7
2019	3	15	53	123	138	13	105	1	5	31
2019	3	15	53	123	138	23	105	1	5	32.2
2019	3	15	53	123	138	13	94	1	5	56.9
2019	3	15	53	123	138	12	95	1	5	65.8
2020	3	15	52	85	100	15	80	2.5	3	24.8
2020	3	15	52	85	100	15	86	2.5	3	27.5
2020	3	15	52	85	100	17	82	2.5	3	42.7
2020	3	15	52	85	100	13	75	2.5	3	44
2020	3	15	52	85	100	16	91	2.5	3	69.1
2018	1	16	35	143	158	13	78	1.5	4	9.7
2018	1	16	35	143	158	12	108	1.5	4	12.9
2018	1	16	35	143	158	11	100	1.5	4	13
2018	1	16	35	143	158	7	97	1.5	4	18.9
2018	1	16	35	143	158	12	101	1.5	4	63.3
2019	1	16	39	128	143	11	69	1	4	24.9
2019	1	16	39	128	143	17	113	1	4	26.8
2019	1	16	39	128	143	17	109	1	4	27.2
2019	1	16	39	128	143	13	118	1	4	32.5
2019	1	16	39	128	143	4	82	1	4	45.6
2020	1	16	43	105	120	20	118	2.5	3	27.4
2020	1	16	43	105	120	13	101	2.5	3	36
2020	1	16	43	105	120	17	106	2.5	3	54
2020	1	16	43	105	120	14	107	2.5	3	62
2020	1	16	43	105	120	8	109	2.5	3	69.3
2018	2	16	32	96	111	14	89	1	4.5	9.4
2018	2	16	32	96	111	14	84	1	4.5	11.4
2018	2	16	32	96	111	19	79	1	4.5	13.1
2018	2	16	32	96	111	16	81	1	4.5	18.1
2018	2	16	32	96	111	13	84	1	4.5	21.5
2019	2	16	39	115	130	15	99	1	4	17.6
2019	2	16	39	115	130	18	94	1	4	28.4
2019	2	16	39	115	130	12	103	1	4	28.9
2019	2	16	39	115	130	12	97	1	4	36.9
2019	2	16	39	115	130	10	90	1	4	37.8
2020	2	16	41	107	122	24	104	1.5	4	18.9
2020	2	16	41	107	122	16	108	1.5	4	31.4
2020	2	16	41	107	122	17	96	1.5	4	35.1
2020	2	16	41	107	122	13	94	1.5	4	52.8
2020	2	16	41	107	122	13	100	1.5	4	90.1
2019	3	16	56	113	128	9	54	1.5	4	18.1
2019	3	16	56	113	128	9	56	1.5	4	56.8
2019	3	16	56	113	128	10	62	1.5	4	59.1
2019	3	16	56	113	128	10	64	1.5	4	62.5
2019	3	16	56	113	128	8	60	1.5	4	63.1
2020	3	16	54	88	103	10	100	2	3.5	15
2020	3	16	54	88	103	6	111	2	3.5	34.5
2020	3	16	54	88	103	9	98	2	3.5	35.7
2020	3	16	54	88	103	13	102	2	3.5	41.3
2020	3	16	54	88	103	11	118	2	3.5	42.1
2018	1	17	33	119	134	12	121	2	3	7.6
2018	1	17	33	119	134	13	111	2	3	9.1
2018	1	17	33	119	134	13	84	2	3	10.5
2018	1	17	33	119	134	12	113	2	3	10.6
2018	1	17	33	119	134	14	110	2	3	11.99
2019	1	17	39	123	138	11	103	1	4.5	33.4
2019	1	17	39	123	138	12	101	1	4.5	37.3
2019	1	17	39	123	138	9	105	1	4.5	59.3
2019	1	17	39	123	138	10	115	1	4.5	59.3
2019	1	17	39	123	138	12	105	1	4.5	77.7
2020	1	17	36	97	112	19	102	2	3	19.1
2020	1	17	36	97	112	21	112	2	3	27.1
2020	1	17	36	97	112	15	97	2	3	37.8
2020	1	17	36	97	112	10	105	2	3	55.8
2020	1	17	36	97	112	20	104	2	3	59
2018	2	17	32	73	88	16	53	1	3	4.7
2018	2	17	32	73	88	8	60	1	3	16.3
2018	2	17	32	73	88	8	54	1	3	16.4
2018	2	17	32	73	88	7	63	1	3	16.8
2018	2	17	32	73	88	8	57	1	3	21
2019	2	17	29	99	114	10	73	1.5	3.5	10.1
2019	2	17	29	99	114	8	77	1.5	3.5	11.3
2019	2	17	29	99	114	10	78	1.5	3.5	12.6
2019	2	17	29	99	114	9	79	1.5	3.5	14.5
2019	2	17	29	99	114	9	79	1.5	3.5	25.1
2020	2	17	36	107	122	12	98	1.5	3.5	39.5
2020	2	17	36	107	122	17	95	1.5	3.5	43.9
2020	2	17	36	107	122	12	92	1.5	3.5	46.7
2020	2	17	36	107	122	10	92	1.5	3.5	55.9
2020	2	17	36	107	122	13	95	1.5	3.5	103.9
2019	3	17	53	113	128	10	73	1	5	21.1
2019	3	17	53	113	128	13	77	1	5	52.3
2019	3	17	53	113	128	14	79	1	5	56.2
2019	3	17	53	113	128	12	82	1	5	59.4
2019	3	17	53	113	128	12	81	1	5	68.1
2020	3	17	53	88	103	10	87	2.5	3	34.7
2020	3	17	53	88	103	14	92	2.5	3	36.5
2020	3	17	53	88	103	10	88	2.5	3	58.1
2020	3	17	53	88	103	11	99	2.5	3	61.4
2020	3	17	53	88	103	10	95	2.5	3	67.6
2018	1	18	34	146	161	6	98	2	3.5	13.7
2018	1	18	34	146	161	35	124	2	3.5	20.8
2018	1	18	34	146	161	18	121	2	3.5	22
2018	1	18	34	146	161	23	114	2	3.5	23.8
2018	1	18	34	146	161	9	87	2	3.5	28.4
2019	1	18	44	120	135	15	108	1	5	32.3
2019	1	18	44	120	135	13	102	1	5	35.9
2019	1	18	44	120	135	8	105	1	5	61.6
2019	1	18	44	120	135	12	113	1	5	64.3
2019	1	18	44	120	135	14	114	1	5	88.2
2020	1	18	51	112	127	16	90	2.5	2	17.6
2020	1	18	51	112	127	24	108	2.5	2	37.6
2020	1	18	51	112	127	15	103	2.5	2	70.7
2020	1	18	51	112	127	10	89	2.5	2	82.9
2020	1	18	51	112	127	13	107	2.5	2	116.8
2018	2	18	32	73	88	8	48	1	2	6.6
2018	2	18	32	73	88	9	61	1	2	10.1
2018	2	18	32	73	88	9	64	1	2	11.6
2018	2	18	32	73	88	9	57	1	2	12.3
2018	2	18	32	73	88	10	63	1	2	13.6
2019	2	18	32	113	128	10	119	4	2.5	20.4
2019	2	18	32	113	128	12	111	4	2.5	24.2
2019	2	18	32	113	128	13	110	4	2.5	32.1
2019	2	18	32	113	128	14	115	4	2.5	35.9
2019	2	18	32	113	128	14	118	4	2.5	37.7
2020	2	18	36	107	122	14	110	2.5	3.5	32.2
2020	2	18	36	107	122	20	107	2.5	3.5	34.4
2020	2	18	36	107	122	17	102	2.5	3.5	36.3
2020	2	18	36	107	122	17	106	2.5	3.5	40.4
2020	2	18	36	107	122	12	81	2.5	3.5	44.1
2019	9	18	52	111	126	13	54	1	4.5	37.5
2019	9	18	52	111	126	11	57	1	4.5	39.7
2019	9	18	52	111	126	11	58	1	4.5	42.1
2019	9	18	52	111	126	9	58	1	4.5	49.6
2019	9	18	52	111	126	13	60	1	4.5	104.6
2020	9	18	43	76	91	10	76	3.5	2.5	25.8
2020	9	18	43	76	91	9	87	3.5	2.5	26.1
2020	9	18	43	76	91	11	78	3.5	2.5	27.9
2020	9	18	43	76	91	12	70	3.5	2.5	33.4
2020	9	18	43	76	91	12	75	3.5	2.5	39.5
2019	3	19	52	115	130	6	102	1.5	4.5	23.2
2019	3	19	52	115	130	10	99	1.5	4.5	33.6
2019	3	19	52	115	130	17	113	1.5	4.5	35.9
2019	3	19	52	115	130	8	90	1.5	4.5	41.9
2019	3	19	52	115	130	14	93	1.5	4.5	51.7
2020	3	19	49	79	94	19	104	4.5	1.5	19.3
2020	3	19	49	79	94	6	120	4.5	1.5	26.3
2020	3	19	49	79	94	10	112	4.5	1.5	45.6
2020	3	19	49	79	94	14	106	4.5	1.5	46.8
2020	3	19	49	79	94	17	101	4.5	1.5	47.3
2018	5	19	31	95	110	13	62	1.5	2.5	1.9
2018	5	19	31	95	110	12	65	1.5	2.5	3.8
2018	5	19	31	95	110	11	25	1.5	2.5	8.9
2018	5	19	31	95	110	15	62	1.5	2.5	14
2018	5	19	31	95	110	15	64	1.5	2.5	22.1
2019	5	19	39	96	111	8	65	1	4	13.7
2019	5	19	39	96	111	4	62	1	4	19.1
2019	5	19	39	96	111	3	59	1	4	21.7
2019	5	19	39	96	111	6	55	1	4	23.2
2019	5	19	39	96	111	4	58	1	4	33.9
2020	5	19	32	93	108	12	83	1.5	2.5	18.1
2020	5	19	32	93	108	7	66	1.5	2.5	21.9
2020	5	19	32	93	108	10	80	1.5	2.5	23.1
2020	5	19	32	93	108	6	70	1.5	2.5	27.8
2020	5	19	32	93	108	3	70	1.5	2.5	36.3
2018	11	19	33	102	117	14	69	1	5	15
2018	11	19	33	102	117	16	75	1	5	19
2018	11	19	33	102	117	17	70	1	5	21.4
2018	11	19	33	102	117	10	71	1	5	27.2
2018	11	19	33	102	117	12	65	1	5	36.6
2019	11	19	44	115	130	17	99	4	2.5	15.7
2019	11	19	44	115	130	17	92	4	2.5	20.4
2019	11	19	44	115	130	18	84	4	2.5	22.4
2019	11	19	44	115	130	22	82	4	2.5	26.9
2019	11	19	44	115	130	14	80	4	2.5	38.2
2020	11	19	43	107	122	20	67	2.5	3.5	46.2
2020	11	19	43	107	122	20	61	2.5	3.5	47.4
2020	11	19	43	107	122	14	63	2.5	3.5	47.7
2020	11	19	43	107	122	18	72	2.5	3.5	47.9
2020	11	19	43	107	122	15	59	2.5	3.5	56
2018	1	20	32	119	134	19	72	1.5	3	4.4
2018	1	20	32	119	134	14	77	1.5	3	9.3
2018	1	20	32	119	134	9	74	1.5	3	13.6
2018	1	20	32	119	134	9	91	1.5	3	17.5
2018	1	20	32	119	134	8	57	1.5	3	26.8
2019	1	20	39	126	141	10	86	1	4.5	23.7
2019	1	20	39	126	141	14	84	1	4.5	39.3
2019	1	20	39	126	141	13	88	1	4.5	49.3
2019	1	20	39	126	141	12	76	1	4.5	62.5
2019	1	20	39	126	141	7	89	1	4.5	86.6
2020	1	20	32	97	112	12	94	1.5	3	58.9
2020	1	20	32	97	112	12	90	1.5	3	66.5
2020	1	20	32	97	112	16	101	1.5	3	71.8
2020	1	20	32	97	112	9	79	1.5	3	72.6
2020	1	20	32	97	112	15	93	1.5	3	83.2
2018	2	20	30	73	88	4	54	1	2.5	7.1
2018	2	20	30	73	88	10	62	1	2.5	8.6
2018	2	20	30	73	88	5	59	1	2.5	9
2018	2	20	30	73	88	7	53	1	2.5	9.2
2018	2	20	30	73	88	7	56	1	2.5	14.7
2019	2	20	30	82	97	9	108	3.5	3.5	19.9
2019	2	20	30	82	97	15	95	3.5	3.5	21.9
2019	2	20	30	82	97	10	104	3.5	3.5	22.9
2019	2	20	30	82	97	17	109	3.5	3.5	24.2
2019	2	20	30	82	97	15	113	3.5	3.5	29.8
2020	2	20	37	106	121	18	111	2.5	3	13.6
2020	2	20	37	106	121	14	91	2.5	3	19.3
2020	2	20	37	106	121	22	91	2.5	3	25.9
2020	2	20	37	106	121	14	102	2.5	3	34.6
2020	2	20	37	106	121	13	114	2.5	3	36.3
2019	3	20	52	113	138	15	71	1	4	23.5
2019	3	20	52	113	138	12	54	1	4	50.8
2019	3	20	52	113	138	12	59	1	4	71
2019	3	20	52	113	138	16	64	1	4	105.6
2019	3	20	52	113	138	11	69	1	4	115.5
2020	3	20	62	100	115	30	112	5	1.5	18.1
2020	3	20	62	100	115	17	112	5	1.5	30.5
2020	3	20	62	100	115	17	95	5	1.5	33.5
2020	3	20	62	100	115	17	108	5	1.5	41.1
2020	3	20	62	100	115	12	90	5	1.5	42
2018	1	21	35	142	157	8	116	1.5	3	6.5
2018	1	21	35	142	157	5	82	1.5	3	10.1
2018	1	21	35	142	157	5	129	1.5	3	12
2018	1	21	35	142	157	10	108	1.5	3	17.5
2018	1	21	35	142	157	12	106	1.5	3	20.3
2019	1	21	37	128	143	17	113	1	4	15.7
2019	1	21	37	128	143	16	117	1	4	20.4
2019	1	21	37	128	143	10	67	1	4	20.7
2019	1	21	37	128	143	7	77	1	4	23.6
2019	1	21	37	128	143	15	104	1	4	71.5
2020	1	21	41	103	118	7	61	1.5	3	13.6
2020	1	21	41	103	118	6	83	1.5	3	20.2
2020	1	21	41	103	118	14	96	1.5	3	21.9
2020	1	21	41	103	118	6	77	1.5	3	69.9
2020	1	21	41	103	118	7	93	1.5	3	75.5
2018	2	21	34	80	95	22	79	1	2.5	6.5
2018	2	21	34	80	95	21	71	1	2.5	7.8
2018	2	21	34	80	95	20	79	1	2.5	13.8
2018	2	21	34	80	95	21	81	1	2.5	15.1
2018	2	21	34	80	95	31	68	1	2.5	28.5
2019	2	21	30	114	129	18	96	1.5	3.5	12.7
2019	2	21	30	114	129	14	96	1.5	3.5	13.3
2019	2	21	30	114	129	16	100	1.5	3.5	13.7
2019	2	21	30	114	129	15	95	1.5	3.5	16.8
2019	2	21	30	114	129	12	102	1.5	3.5	17
2020	2	21	36	103	118	20	86	2	4	45.3
2020	2	21	36	103	118	10	93	2	4	46.1
2020	2	21	36	103	118	20	96	2	4	46.8
2020	2	21	36	103	118	14	108	2	4	56.1
2020	2	21	36	103	118	10	92	2	4	78.2
2019	3	21	52	113	138	9	65	1	4	37.7
2019	3	21	52	113	138	17	69	1	4	38.8
2019	3	21	52	113	138	7	63	1	4	60.3
2019	3	21	52	113	138	5	64	1	4	90.7
2019	3	21	52	113	138	9	65	1	4	103.4
2020	3	21	50	83	98	11	97	2	3	21.6
2020	3	21	50	83	98	12	95	2	3	25
2020	3	21	50	83	98	10	93	2	3	30.6
2020	3	21	50	83	98	10	76	2	3	38
2020	3	21	50	83	98	9	76	2	3	44
2018	1	22	41	113	128	16	112	3.5	2.5	6.1
2018	1	22	41	113	128	26	109	3.5	2.5	10.4
2018	1	22	41	113	128	15	101	3.5	2.5	12.4
2018	1	22	41	113	128	14	107	3.5	2.5	13.2
2018	1	22	41	113	128	12	120	3.5	2.5	14.6
2019	1	22	43	125	140	18	84	1	3.5	12
2019	1	22	43	125	140	23	104	1	3.5	14
2019	1	22	43	125	140	16	97	1	3.5	14.4
2019	1	22	43	125	140	20	95	1	3.5	18.4
2019	1	22	43	125	140	21	94	1	3.5	26.8
2020	1	22	50	113	128	8	101	1.5	3.5	36.4
2020	1	22	50	113	128	11	104	1.5	3.5	48.1
2018	2	22	35	104	119	20	82	2	3.5	7.5
2018	2	22	35	104	119	18	85	2	3.5	13.4
2018	2	22	35	104	119	18	79	2	3.5	14.5
2018	2	22	35	104	119	15	83	2	3.5	14.7
2018	2	22	35	104	119	14	84	2	3.5	18
2019	2	22	30	110	125	14	103	3	3.5	13.4
2019	2	22	30	110	125	13	98	3	3.5	14
2019	2	22	30	110	125	13	100	3	3.5	16.9
2019	2	22	30	110	125	17	104	3	3.5	21.4
2019	2	22	30	110	125	10	101	3	3.5	35.9
2020	2	22	38	106	121	14	94	1.5	4	12.5
2020	2	22	38	106	121	10	86	1.5	4	18.7
2020	2	22	38	106	121	10	80	1.5	4	35
2020	2	22	38	106	121	18	100	1.5	4	36.9
2020	2	22	38	106	121	13	74	1.5	4	37.2
2020	3	22	51	84	99	10	117	3	3	18.8
2020	3	22	51	84	99	12	114	3	3	19.1
2020	3	22	51	84	99	20	102	3	3	24.2
2020	3	22	51	84	99	15	111	3	3	29
2020	3	22	51	84	99	11	92	3	3	31.4
2018	1	23	39	116	131	8	101	3	2	15.5
2018	1	23	39	116	131	8	98	3	2	15.6
2018	1	23	39	116	131	9	113	3	2	20.5
2018	1	23	39	116	131	9	112	3	2	25.9
2018	1	23	39	116	131	11	128	3	2	45.8
2019	1	23	43	128	143	21	108	1.5	4	17.6
2019	1	23	43	128	143	21	107	1.5	4	21.7
2019	1	23	43	128	143	20	116	1.5	4	24.8
2019	1	23	43	128	143	16	106	1.5	4	50
2019	1	23	43	128	143	17	106	1.5	4	51.8
2020	1	23	41	102	117	17	104	2	3	18.7
2020	1	23	41	102	117	8	112	2	3	19.6
2020	1	23	41	102	117	20	111	2	3	24.7
2020	1	23	41	102	117	12	101	2	3	41.8
2020	1	23	41	102	117	22	108	2	3	55.5
2018	2	23	36	95	110	21	87	2	3.5	9.1
2018	2	23	36	95	110	24	80	2	3.5	10.9
2018	2	23	36	95	110	21	86	2	3.5	13.2
2018	2	23	36	95	110	21	94	2	3.5	16.2
2018	2	23	36	95	110	24	87	2	3.5	18.7
2019	2	23	29	108	123	8	83	1.5	4	15.4
2019	2	23	29	108	123	13	83	1.5	4	17.5
2019	2	23	29	108	123	12	76	1.5	4	19.1
2019	2	23	29	108	123	8	89	1.5	4	25.1
2019	2	23	29	108	123	9	86	1.5	4	28.5
2020	2	23	36	106	121	12	106	2	4	26.4
2020	2	23	36	106	121	18	109	2	4	33.7
2020	2	23	36	106	121	12	120	2	4	35.9
2020	2	23	36	106	121	12	104	2	4	72.2
2020	2	23	36	106	121	8	76	2	4	73.6
2019	3	23	55	118	133	8	46	1	3.5	33.1
2019	3	23	55	118	133	6	38	1	3.5	59
2019	3	23	55	118	133	4	52	1	3.5	60.7
2019	3	23	55	118	133	14	61	1	3.5	69.7
2019	3	23	55	118	133	4	52	1	3.5	95.3
2020	3	23	58	92	107	15	116	3.5	3	18.2
2020	3	23	58	92	107	20	105	3.5	3	22.8
2020	3	23	58	92	107	12	123	3.5	3	33.8
2020	3	23	58	92	107	10	124	3.5	3	41.1
2020	3	23	58	92	107	17	101	3.5	3	79.1
2018	2	24	32	98	113	14	70	1.5	2.5	6.9
2018	2	24	32	98	113	16	88	1.5	2.5	12
2018	2	24	32	98	113	13	86	1.5	2.5	15.1
2018	2	24	32	98	113	16	82	1.5	2.5	27.5
2018	2	24	32	98	113	14	91	1.5	2.5	34.1
2019	2	24	32	110	125	17	97	2	3.5	35.1
2019	2	24	32	110	125	16	89	2	3.5	35.6
2019	2	24	32	110	125	10	98	2	3.5	38.8
2019	2	24	32	110	125	16	90	2	3.5	41.1
2019	2	24	32	110	125	12	93	2	3.5	68.6
2020	2	24	33	89	104	12	83	1	2.5	13.4
2020	2	24	33	89	104	11	74	1	2.5	16.5
2020	2	24	33	89	104	7	74	1	2.5	18.7
2020	2	24	33	89	104	10	74	1	2.5	21.2
2020	2	24	33	89	104	5	75	1	2.5	30.1
2019	3	24	51	113	128	9	47	1	3.5	20.2
2019	3	24	51	113	128	7	49	1	3.5	34.2
2019	3	24	51	113	128	8	47	1	3.5	44.3
2019	3	24	51	113	128	11	47	1	3.5	47.2
2019	3	24	51	113	128	7	40	1	3.5	56.2
2020	3	24	51	85	100	15	97	1	3.5	22.7
2020	3	24	51	85	100	15	89	1	3.5	24.4
2020	3	24	51	85	100	20	96	1	3.5	37.4
2020	3	24	51	85	100	17	79	1	3.5	48.2
2020	3	24	51	85	100	10	85	1	3.5	64.2
2019	9	24	44	118	133	21	58	1	3.5	15.9
2019	9	24	44	118	133	19	70	1	3.5	25.1
2019	9	24	44	118	133	15	54	1	3.5	28.4
2019	9	24	44	118	133	15	57	1	3.5	36
2019	9	24	44	118	133	10	49	1	3.5	36.8
2020	9	24	41	103	118	23	74	2	3.5	12.6
2020	9	24	41	103	118	12	72	2	3.5	15.5
2020	9	24	41	103	118	11	69	2	3.5	19.3
2020	9	24	41	103	118	18	71	2	3.5	24.4
2020	9	24	41	103	118	26	71	2	3.5	35.7
2018	11	24	14	113	128	20	82	3	3	7.7
2018	11	24	14	113	128	11	75	3	3	16.5
2018	11	24	14	113	128	10	85	3	3	18.9
2018	11	24	14	113	128	21	74	3	3	20.2
2018	11	24	14	113	128	26	71	3	3	24
2018	1	25	38	115	130	11	83	1.5	3.5	12.8
2018	1	25	38	115	130	12	86	1.5	3.5	12.9
2018	1	25	38	115	130	10	70	1.5	3.5	20.8
2018	1	25	38	115	130	10	64	1.5	3.5	21.7
2018	1	25	38	115	130	10	66	1.5	3.5	27.6
2019	1	25	41	121	136	11	91	1.5	4	18.1
2019	1	25	41	121	136	12	64	1.5	4	18.9
2019	1	25	41	121	136	8	78	1.5	4	20.6
2019	1	25	41	121	136	13	95	1.5	4	26.9
2019	1	25	41	121	136	9	74	1.5	4	36.8
2020	1	25	34	90	105	13	107	1.5	3.5	12.6
2020	1	25	34	90	105	14	65	1.5	3.5	18.2
2020	1	25	34	90	105	12	85	1.5	3.5	45.2
2020	1	25	34	90	105	15	102	1.5	3.5	46.8
2020	1	25	34	90	105	15	72	1.5	3.5	48.8
2018	6	25	36	100	115	20	81	1.5	4	8.7
2018	6	25	36	100	115	19	87	1.5	4	11.3
2018	6	25	36	100	115	19	90	1.5	4	17.7
2018	6	25	36	100	115	25	89	1.5	4	20.8
2018	6	25	36	100	115	19	87	1.5	4	24.5
2019	6	25	30	110	125	18	99	3.5	3	15.7
2019	6	25	30	110	125	16	97	3.5	3	19.1
2019	6	25	30	110	125	13	85	3.5	3	23.3
2019	6	25	30	110	125	13	78	3.5	3	37
2019	6	25	30	110	125	9	105	3.5	3	54.9
2020	6	25	37	93	108	14	104	2	3.5	32.6
2020	6	25	37	93	108	6	98	2	3.5	36.9
2020	6	25	37	93	108	12	100	2	3.5	38
2020	6	25	37	93	108	9	104	2	3.5	50.8
2020	6	25	37	93	108	11	104	2	3.5	69.7
2019	8	25	55	111	126	13	44	1	4	28.1
2019	8	25	55	111	126	8	47	1	4	31.5
2019	8	25	55	111	126	6	58	1	4	48.3
2019	8	25	55	111	126	12	60	1	4	51.7
2019	8	25	55	111	126	11	49	1	4	54.6
2020	8	25	49	83	98	14	84	3.5	3	15.6
2020	8	25	49	83	98	10	89	3.5	3	17.7
2020	8	25	49	83	98	23	81	3.5	3	20.3
2020	8	25	49	83	98	11	81	3.5	3	20.6
2020	8	25	49	83	98	8	72	3.5	3	28.8
2018	1	26	32	118	133	10	110	2	2.5	23.3
2018	1	26	32	118	133	9	86	2	2.5	28.4
2018	1	26	32	118	133	11	107	2	2.5	33.9
2018	1	26	32	118	133	10	104	2	2.5	76.3
2019	1	26	34	128	143	21	197	2.5	2.5	15
2019	1	26	34	128	143	5	131	2.5	2.5	20.9
2019	1	26	34	128	143	7	115	2.5	2.5	23.1
2019	1	26	34	128	143	13	132	2.5	2.5	34.4
2019	1	26	34	128	143	17	127	2.5	2.5	43.3
2020	1	26	33	97	112	19	100	2.5	3.5	17.7
2020	1	26	33	97	112	11	104	2.5	3.5	23.1
2020	1	26	33	97	112	7	102	2.5	3.5	23.2
2020	1	26	33	97	112	19	109	2.5	3.5	26.8
2020	1	26	33	97	112	16	110	2.5	3.5	30.9
2018	2	26	32	95	110	17	68	1	3.5	10.3
2018	2	26	32	95	110	19	74	1	3.5	12.3
2018	2	26	32	95	110	19	72	1	3.5	12.7
2018	2	26	32	95	110	15	73	1	3.5	16.3
2018	2	26	32	95	110	19	72	1	3.5	16.4
2019	3	26	55	121	136	7	93	1	4.5	12.1
2019	3	26	55	121	136	9	110	1	4.5	22
2019	3	26	55	121	136	13	92	1	4.5	23.4
2019	3	26	55	121	136	12	98	1	4.5	27.2
2019	3	26	55	121	136	15	103	1	4.5	44.9
2020	3	26	52	90	105	15	98	1	3.5	24.2
2020	3	26	52	90	105	14	73	1	3.5	33.2
2020	3	26	52	90	105	16	88	1	3.5	39.5
2020	3	26	52	90	105	8	118	1	3.5	40.3
2020	3	26	52	90	105	8	89	1	3.5	91.7
2019	10	26	32	97	112	16	78	3	2.5	9.8
2019	10	26	32	97	112	14	84	3	2.5	12.1
2019	10	26	32	97	112	13	83	3	2.5	13.5
2019	10	26	32	97	112	15	78	3	2.5	16.1
2019	10	26	32	97	112	14	76	3	2.5	25.9
2020	10	26	34	99	114	4	72	2	3	16.2
2020	10	26	34	99	114	5	70	2	3	29.4
2020	10	26	34	99	114	4	69	2	3	39.8
2020	10	26	34	99	114	6	71	2	3	51.8
2020	10	26	34	99	114	5	72	2	3	81.4
2018	1	27	32	116	131	10	79	1.5	3.5	11.7
2018	1	27	32	116	131	13	80	1.5	3.5	21.1
2018	1	27	32	116	131	12	73	1.5	3.5	27.4
2018	1	27	32	116	131	9	81	1.5	3.5	50.2
2018	1	27	32	116	131	7	80	1.5	3.5	80.2
2019	1	27	34	121	136	14	122	2.5	3	12.9
2019	1	27	34	121	136	16	113	2.5	3	15.1
2019	1	27	34	121	136	9	106	2.5	3	15.8
2019	1	27	34	121	136	10	53	2.5	3	17.3
2019	1	27	34	121	136	10	85	2.5	3	43
2020	1	27	45	110	125	17	101	2.5	3	13.1
2020	1	27	45	110	125	13	94	2.5	3	18.7
2020	1	27	45	110	125	13	101	2.5	3	40.9
2020	1	27	45	110	125	14	87	2.5	3	45.8
2020	1	27	45	110	125	13	104	2.5	3	52.7
2018	2	27	32	73	88	14	63	1	3.5	8.1
2018	2	27	32	73	88	13	66	1	3.5	9.7
2018	2	27	32	73	88	16	77	1	3.5	12.4
2018	2	27	32	73	88	14	68	1	3.5	13.3
2018	2	27	32	73	88	13	78	1	3.5	23.7
2019	2	27	31	110	125	14	85	2.5	3	10.4
2019	2	27	31	110	125	19	100	2.5	3	15.7
2019	2	27	31	110	125	18	105	2.5	3	22.2
2019	2	27	31	110	125	13	101	2.5	3	29
2019	2	27	31	110	125	13	97	2.5	3	31.2
2020	2	27	39	105	120	13	100	1.5	4	24.8
2020	2	27	39	105	120	19	103	1.5	4	29
2020	2	27	39	105	120	16	94	1.5	4	51.4
2020	2	27	39	105	120	15	103	1.5	4	84.8
2020	2	27	39	105	120	16	99	1.5	4	87.2
2019	4	27	64	138	153	26	117	1	4	7.2
2019	4	27	64	138	153	12	117	1	4	11.9
2019	4	27	64	138	153	16	118	1	4	13.9
2019	4	27	64	138	153	17	108	1	4	18.3
2019	4	27	64	138	153	14	120	1	4	28.9
2020	4	27	78	121	136	17	127	1.5	4.5	6
2020	4	27	78	121	136	23	140	1.5	4.5	8.1
2020	4	27	78	121	136	21	137	1.5	4.5	11.1
2020	4	27	78	121	136	34	140	1.5	4.5	11.2
2020	4	27	78	121	136	19	141	1.5	4.5	16.6
2018	1	28	31	113	128	13	91	2	2.5	9.9
2018	1	28	31	113	128	11	76	2	2.5	11.1
2018	1	28	31	113	128	13	86	2	2.5	14
2018	1	28	31	113	128	16	79	2	2.5	14.8
2018	1	28	31	113	128	16	92	2	2.5	19.3
2019	1	28	34	128	143	10	78	1	4	6.4
2019	1	28	34	128	143	13	76	1	4	11.7
2019	1	28	34	128	143	8	85	1	4	18.8
2019	1	28	34	128	143	8	70	1	4	30.1
2019	1	28	34	128	143	9	86	1	4	47.2
2020	1	28	48	112	127	13	108	2	3.5	25.9
2020	1	28	48	112	127	16	122	2	3.5	30.8
2020	1	28	48	112	127	13	124	2	3.5	36.1
2020	1	28	48	112	127	6	118	2	3.5	42.7
2020	1	28	48	112	127	13	116	2	3.5	43.4
2018	2	28	31	98	113	8	63	1.5	2.5	12.6
2018	2	28	31	98	113	12	65	1.5	2.5	13
2018	2	28	31	98	113	6	66	1.5	2.5	20.8
2018	2	28	31	98	113	10	59	1.5	2.5	28.5
2018	2	28	31	98	113	13	88	1.5	2.5	39.1
2019	2	28	29	99	114	13	93	2.5	3	19.8
2019	2	28	29	99	114	13	92	2.5	3	25.3
2019	2	28	29	99	114	14	94	2.5	3	27.7
2019	2	28	29	99	114	12	100	2.5	3	33.8
2019	2	28	29	99	114	16	91	2.5	3	47.6
2020	2	28	34	98	113	16	102	1	4	21.5
2020	2	28	34	98	113	15	101	1	4	29.8
2020	2	28	34	98	113	14	101	1	4	30.8
2020	2	28	34	98	113	12	95	1	4	34.6
2020	2	28	34	98	113	20	97	1	4	74.2
2020	3	28	57	96	111	12	99	2	3.5	28.5
2020	3	28	57	96	111	11	121	2	3.5	37.5
2020	3	28	57	96	111	8	120	2	3.5	37.8
2020	3	28	57	96	111	24	107	2	3.5	39
2020	3	28	57	96	111	11	100	2	3.5	44
2018	1	29	35	120	135	20	91	1.5	3	14.6
2018	1	29	35	120	135	15	97	1.5	3	19.8
2018	1	29	35	120	135	14	91	1.5	3	23.8
2018	1	29	35	120	135	6	103	1.5	3	26.6
2019	1	29	42	130	145	20	192	2.5	2	9.8
2019	1	29	42	130	145	13	133	2.5	2	19.7
2019	1	29	42	130	145	16	133	2.5	2	32.1
2019	1	29	42	130	145	13	195	2.5	2	53.7
2019	1	29	42	130	145	10	182	2.5	2	54.2
2020	1	29	33	100	115	10	111	1.5	4	25.2
2020	1	29	33	100	115	12	104	1.5	4	31
2020	1	29	33	100	115	11	92	1.5	4	61.7
2020	1	29	33	100	115	9	87	1.5	4	63.2
2020	1	29	33	100	115	9	96	1.5	4	73.4
2018	2	29	30	73	88	11	50	2	2.5	8.8
2018	2	29	30	73	88	8	55	2	2.5	10.2
2018	2	29	30	73	88	13	55	2	2.5	12.2
2018	2	29	30	73	88	12	53	2	2.5	13
2018	2	29	30	73	88	18	55	2	2.5	18.9
2019	2	29	29	99	114	10	82	2	3.5	33.2
2019	2	29	29	99	114	21	102	2	3.5	49.3
2019	2	29	29	99	114	12	80	2	3.5	50.8
2019	2	29	29	99	114	15	86	2	3.5	52.2
2019	2	29	29	99	114	17	85	2	3.5	67.2
2020	2	29	38	102	117	15	81	1.5	3.5	25.6
2020	2	29	38	102	117	17	98	1.5	3.5	26.5
2020	2	29	38	102	117	17	109	1.5	3.5	36.5
2020	2	29	38	102	117	17	106	1.5	3.5	57.1
2020	2	29	38	102	117	15	102	1.5	3.5	60.8
2019	3	29	55	123	138	17	102	2	4	54.7
2019	3	29	55	123	138	13	80	2	4	75.1
2020	3	29	47	83	98	10	88	2	3	21.2
2020	3	29	47	83	98	10	74	2	3	29.8
2020	3	29	47	83	98	9	62	2	3	34
2020	3	29	47	83	98	7	76	2	3	50.9
2020	3	29	47	83	98	10	72	2	3	54.3
2018	1	30	32	112	127	10	81	1.5	2.5	8.9
2018	1	30	32	112	127	12	71	1.5	2.5	16.2
2018	1	30	32	112	127	8	75	1.5	2.5	16.3
2018	1	30	32	112	127	13	82	1.5	2.5	18
2018	1	30	32	112	127	7	69	1.5	2.5	19.4
2019	1	30	41	123	138	11	122	2	3.5	25.8
2019	1	30	41	123	138	17	133	2	3.5	36.4
2019	1	30	41	123	138	21	120	2	3.5	45.7
2019	1	30	41	123	138	12	126	2	3.5	64
2019	1	30	41	123	138	15	102	2	3.5	75.1
2020	1	30	41	107	122	14	84	1.5	2	18
2020	1	30	41	107	122	14	88	1.5	2	18.6
2020	1	30	41	107	122	18	108	1.5	2	28.2
2020	1	30	41	107	122	12	84	1.5	2	47.4
2018	2	30	30	73	88	13	56	1	2.5	4.7
2018	2	30	30	73	88	12	64	1	2.5	15.2
2018	2	30	30	73	88	11	59	1	2.5	20.1
2018	2	30	30	73	88	12	58	1	2.5	24.6
2018	2	30	30	73	88	11	55	1	2.5	25.6
2019	2	30	36	101	116	12	82	2	3	34.5
2019	2	30	36	101	116	18	87	2	3	42.5
2019	2	30	36	101	116	21	96	2	3	42.8
2019	2	30	36	101	116	16	90	2	3	53.3
2019	2	30	36	101	116	14	90	2	3	57.5
2020	2	30	36	102	117	16	101	2	4	31.8
2020	2	30	36	102	117	15	86	2	4	37.6
2020	2	30	36	102	117	16	101	2	4	43.6
2020	2	30	36	102	117	12	90	2	4	49.3
2020	2	30	36	102	117	9	94	2	4	52.7
2020	3	30	53	90	105	13	114	3	2	32.9
2020	3	30	53	90	105	18	116	3	2	36.6
2020	3	30	53	90	105	11	94	3	2	47.1
2020	3	30	53	90	105	10	103	3	2	47.7
2020	3	30	53	90	105	17	123	3	2	63.1
2018	2	31	32	95	110	23	69	1.5	3	5.8
2018	2	31	32	95	110	14	84	1.5	3	7.6
2018	2	31	32	95	110	21	64	1.5	3	10
2018	2	31	32	95	110	16	66	1.5	3	10.3
2018	2	31	32	95	110	17	74	1.5	3	12.3
2019	2	31	33	110	125	18	103	2.5	3	18.3
2019	2	31	33	110	125	17	102	2.5	3	24.6
2019	2	31	33	110	125	15	92	2.5	3	34.3
2019	2	31	33	110	125	11	105	2.5	3	40.2
2019	2	31	33	110	125	13	97	2.5	3	46.2
2020	2	31	31	91	106	12	82	2	3.5	34.4
2020	2	31	31	91	106	10	89	2	3.5	36.9
2020	2	31	31	91	106	20	85	2	3.5	43.2
2020	2	31	31	91	106	9	78	2	3.5	51.9
2020	2	31	31	91	106	13	86	2	3.5	56.3
2019	4	31	71	132	147	20	128	1.5	3.5	3.4
2019	4	31	71	132	147	20	118	1.5	3.5	3.8
2019	4	31	71	132	147	13	138	1.5	3.5	5.1
2019	4	31	71	132	147	13	132	1.5	3.5	9
2019	4	31	71	132	147	12	116	1.5	3.5	11.2
2020	4	31	74	104	119	15	113	2	2.5	4.8
2020	4	31	74	104	119	17	110	2	2.5	15.8
2020	4	31	74	104	119	12	99	2	2.5	33.4
2020	4	31	74	104	119	12	113	2	2.5	36.1
2020	4	31	74	104	119	13	97	2	2.5	37.6
2019	9	31	52	108	123	13	63	1	4	22.9
2019	9	31	52	108	123	10	59	1	4	28.2
2019	9	31	52	108	123	19	72	1	4	43.5
2019	9	31	52	108	123	17	69	1	4	46.1
2019	9	31	52	108	123	8	63	1	4	52.8
2020	9	31	43	76	91	19	80	3	2.5	15.1
2020	9	31	43	76	91	17	75	3	2.5	16.1
2020	9	31	43	76	91	7	85	3	2.5	16.4
2020	9	31	43	76	91	14	92	3	2.5	19.2
2020	9	31	43	76	91	21	72	3	2.5	23.1
2018	1	32	35	119	134	18	89	1.5	2.5	7.4
2018	1	32	35	119	134	25	92	1.5	2.5	11.1
2018	1	32	35	119	134	13	120	1.5	2.5	11.5
2018	1	32	35	119	134	20	129	1.5	2.5	12.8
2019	1	32	32	134	149	8	124	1.5	3.5	11.5
2019	1	32	32	134	149	7	121	1.5	3.5	12
2019	1	32	32	134	149	9	130	1.5	3.5	27.3
2019	1	32	32	134	149	10	128	1.5	3.5	29.2
2019	1	32	32	134	149	14	117	1.5	3.5	42.7
2020	1	32	50	113	128	16	103	1	3	18.6
2020	1	32	50	113	128	24	103	1	3	23.3
2020	1	32	50	113	128	8	85	1	3	24.2
2020	1	32	50	113	128	15	103	1	3	26.7
2020	1	32	50	113	128	21	111	1	3	69.9
2018	2	32	36	101	116	21	95	1	3	9.6
2018	2	32	36	101	116	16	90	1	3	13.4
2018	2	32	36	101	116	20	81	1	3	13.8
2018	2	32	36	101	116	14	79	1	3	16.6
2018	2	32	36	101	116	15	84	1	3	22.1
2019	2	32	30	110	125	16	94	2	3	16.2
2019	2	32	30	110	125	16	87	2	3	16.8
2019	2	32	30	110	125	17	97	2	3	21.5
2019	2	32	30	110	125	19	101	2	3	32.7
2019	2	32	30	110	125	13	88	2	3	48.3
2020	2	32	36	99	114	11	99	2.5	3	32.2
2020	2	32	36	99	114	13	117	2.5	3	35.1
2020	2	32	36	99	114	7	109	2.5	3	39.6
2020	2	32	36	99	114	12	96	2.5	3	61.7
2020	2	32	36	99	114	12	96	2.5	3	84.7
2020	3	32	56	96	111	16	108	2	2.5	23.9
2020	3	32	56	96	111	26	107	2	2.5	26.9
2020	3	32	56	96	111	21	119	2	2.5	30
2020	3	32	56	96	111	10	118	2	2.5	36.9
2020	3	32	56	96	111	15	119	2	2.5	52.3
2018	1	33	19	119	134	10	107	2.5	2.5	8.8
2018	1	33	19	119	134	18	123	2.5	2.5	14.5
2018	1	33	19	119	134	30	114	2.5	2.5	14.9
2018	1	33	19	119	134	14	127	2.5	2.5	21.1
2018	1	33	19	119	134	15	114	2.5	2.5	42.1
2020	1	33	36	103	118	17	104	1.5	3	18.7
2020	1	33	36	103	118	10	72	1.5	3	31.2
2020	1	33	36	103	118	11	74	1.5	3	38.3
2020	1	33	36	103	118	12	99	1.5	3	47.4
2020	1	33	36	103	118	9	73	1.5	3	59.9
2018	2	33	35	101	116	14	76	1	3.5	13
2018	2	33	35	101	116	14	70	1	3.5	14.8
2018	2	33	35	101	116	14	80	1	3.5	18
2018	2	33	35	101	116	15	79	1	3.5	19
2018	2	33	35	101	116	12	79	1	3.5	20.9
2019	2	33	30	113	128	23	106	3	3	20.2
2019	2	33	30	113	128	12	95	3	3	22.1
2019	2	33	30	113	128	15	112	3	3	22.5
2019	2	33	30	113	128	15	99	3	3	25.5
2019	2	33	30	113	128	12	119	3	3	36
2020	2	33	36	98	113	14	120	2.5	3.5	20.7
2020	2	33	36	98	113	15	117	2.5	3.5	30.6
2020	2	33	36	98	113	12	113	2.5	3.5	38.7
2020	2	33	36	98	113	15	110	2.5	3.5	49.2
2020	2	33	36	98	113	13	109	2.5	3.5	55.6
2020	3	33	61	103	118	18	122	5	1	23.2
2020	3	33	61	103	118	21	120	5	1	28.6
2020	3	33	61	103	118	20	118	5	1	40.9
2020	3	33	61	103	118	23	106	5	1	55.3
2018	1	34	32	112	127	15	92	2	3.5	11.4
2018	1	34	32	112	127	30	105	2	3.5	15
2018	1	34	32	112	127	18	96	2	3.5	15.2
2018	1	34	32	112	127	18	102	2	3.5	17.7
2018	1	34	32	112	127	17	101	2	3.5	31.5
2019	1	34	34	113	128	17	94	2.5	3.5	30.8
2019	1	34	34	113	128	12	87	2.5	3.5	51.9
2019	1	34	34	113	128	9	81	2.5	3.5	62
2019	1	34	34	113	128	9	90	2.5	3.5	70.9
2019	1	34	34	113	128	10	84	2.5	3.5	105.6
2020	1	34	38	104	119	8	121	1.5	3.5	29.5
2020	1	34	38	104	119	3	107	1.5	3.5	33.4
2020	1	34	38	104	119	7	99	1.5	3.5	37.1
2020	1	34	38	104	119	12	98	1.5	3.5	38.2
2020	1	34	38	104	119	7	91	1.5	3.5	86.8
2018	2	34	30	73	88	13	59	1	2.5	9.5
2018	2	34	30	73	88	10	57	1	2.5	10.7
2018	2	34	30	73	88	18	59	1	2.5	12.7
2018	2	34	30	73	88	18	61	1	2.5	17.6
2018	2	34	30	73	88	13	55	1	2.5	24.6
2019	3	34	53	113	128	13	71	1	4.5	32
2019	3	34	53	113	128	17	70	1	4.5	45.5
2019	3	34	53	113	128	15	75	1	4.5	57.1
2019	3	34	53	113	128	11	75	1	4.5	75.9
2019	3	34	53	113	128	15	67	1	4.5	84.1
2020	3	34	42	81	96	19	78	1.5	3.5	17
2020	3	34	42	81	96	10	71	1.5	3.5	18.3
2020	3	34	42	81	96	8	79	1.5	3.5	21.5
2020	3	34	42	81	96	12	75	1.5	3.5	23.7
2020	3	34	42	81	96	9	65	1.5	3.5	40.6
2019	6	34	36	110	125	14	100	3	3	33
2019	6	34	36	110	125	13	106	3	3	36.2
2019	6	34	36	110	125	12	112	3	3	46.5
2019	6	34	36	110	125	12	102	3	3	62.2
2019	6	34	36	110	125	18	73	3	3	73.4
2020	6	34	34	97	112	14	113	2	3.5	6
2020	6	34	34	97	112	21	113	2	3.5	15.3
2020	6	34	34	97	112	15	107	2	3.5	21.3
2020	6	34	34	97	112	13	98	2	3.5	27.9
2020	6	34	34	97	112	17	106	2	3.5	41.4
2018	1	35	32	144	159	22	89	2	3.5	9.7
2018	1	35	32	144	159	10	112	2	3.5	21.3
2018	1	35	32	144	159	17	117	2	3.5	35.6
2018	1	35	32	144	159	10	80	2	3.5	44.1
2018	1	35	32	144	159	17	117	2	3.5	50.1
2020	1	35	34	107	122	11	86	2.5	2.5	6.6
2020	1	35	34	107	122	18	69	2.5	2.5	14.6
2020	1	35	34	107	122	12	69	2.5	2.5	19.8
2020	1	35	34	107	122	12	85	2.5	2.5	26.1
2020	1	35	34	107	122	15	119	2.5	2.5	29
2018	2	35	35	104	119	13	63	2	2.5	9.2
2018	2	35	35	104	119	13	70	2	2.5	9.7
2018	2	35	35	104	119	11	71	2	2.5	10.1
2018	2	35	35	104	119	17	65	2	2.5	10.6
2018	2	35	35	104	119	13	65	2	2.5	20.6
2019	2	35	39	113	128	12	78	2.5	2.5	18.3
2019	2	35	39	113	128	18	94	2.5	2.5	27.3
2019	2	35	39	113	128	18	96	2.5	2.5	27.6
2019	2	35	39	113	128	15	100	2.5	2.5	58.7
2019	2	35	39	113	128	14	92	2.5	2.5	80.4
2020	2	35	40	103	118	17	112	1.5	4	15.6
2020	2	35	40	103	118	20	120	1.5	4	20.4
2020	2	35	40	103	118	18	115	1.5	4	23.9
2020	2	35	40	103	118	15	108	1.5	4	31.7
2020	2	35	40	103	118	17	112	1.5	4	71.7
2019	3	35	58	113	128	12	94	1	4.5	44.3
2019	3	35	58	113	128	21	81	1	4.5	49
2019	3	35	58	113	128	10	90	1	4.5	57.8
2019	3	35	58	113	128	9	76	1	4.5	60.7
2019	3	35	58	113	128	10	76	1	4.5	71.4
2020	3	35	50	87	102	8	120	3	3.5	29.4
2020	3	35	50	87	102	7	100	3	3.5	34.3
2020	3	35	50	87	102	10	80	3	3.5	49.3
2020	3	35	50	87	102	8	105	3	3.5	55.7
2020	3	35	50	87	102	10	102	3	3.5	58.1
2018	1	36	32	146	161	12	109	1.5	4	13.1
2018	1	36	32	146	161	8	93	1.5	4	13.7
2018	1	36	32	146	161	6	127	1.5	4	15.5
2018	1	36	32	146	161	12	105	1.5	4	18
2018	1	36	32	146	161	11	122	1.5	4	32.5
2019	1	36	34	121	136	16	100	1.5	3.5	6
2019	1	36	34	121	136	23	111	1.5	3.5	10.4
2019	1	36	34	121	136	15	73	1.5	3.5	15.5
2019	1	36	34	121	136	22	116	1.5	3.5	22.6
2019	1	36	34	121	136	9	116	1.5	3.5	27
2020	1	36	47	110	125	16	124	3	2.5	22.9
2020	1	36	47	110	125	17	116	3	2.5	38.4
2020	1	36	47	110	125	12	133	3	2.5	43.2
2020	1	36	47	110	125	14	121	3	2.5	73.1
2018	2	36	30	73	88	19	56	1.5	3	6.8
2018	2	36	30	73	88	14	51	1.5	3	7.9
2018	2	36	30	73	88	18	65	1.5	3	11.1
2018	2	36	30	73	88	17	66	1.5	3	13.1
2018	2	36	30	73	88	8	59	1.5	3	19.1
2019	2	36	33	108	123	11	90	2	3	14.4
2019	2	36	33	108	123	12	84	2	3	18.3
2019	2	36	33	108	123	14	74	2	3	21.1
2019	2	36	33	108	123	8	88	2	3	23
2020	2	36	38	101	116	16	85	1	4	30
2020	2	36	38	101	116	16	92	1	4	31.8
2020	2	36	38	101	116	18	86	1	4	45.5
2020	2	36	38	101	116	7	80	1	4	54.6
2020	2	36	38	101	116	7	78	1	4	58.3
2019	3	36	57	113	128	13	92	1	5	24
2019	3	36	57	113	128	11	86	1	5	43.4
2019	3	36	57	113	128	12	80	1	5	47.5
2019	3	36	57	113	128	15	81	1	5	70.7
2019	3	36	57	113	128	10	95	1	5	79.1
2020	3	36	54	89	104	18	102	2.5	4.5	32.7
2020	3	36	54	89	104	11	115	2.5	4.5	43.1
2020	3	36	54	89	104	6	90	2.5	4.5	46.3
2020	3	36	54	89	104	10	117	2.5	4.5	52.3
2020	3	36	54	89	104	14	133	2.5	4.5	58.7
2018	1	37	32	116	131	9	91	1.5	3.5	14.5
2018	1	37	32	116	131	18	100	1.5	3.5	15.8
2018	1	37	32	116	131	16	112	1.5	3.5	20.1
2018	1	37	32	116	131	14	100	1.5	3.5	27.4
2018	1	37	32	116	131	24	105	1.5	3.5	28.1
2019	1	37	30	123	138	9	125	1.5	4	7.2
2019	1	37	30	123	138	21	120	1.5	4	13.2
2019	1	37	30	123	138	9	105	1.5	4	28.1
2019	1	37	30	123	138	8	107	1.5	4	62.5
2019	1	37	30	123	138	12	96	1.5	4	93.1
2020	1	37	33	97	112	11	100	2	4	28.2
2020	1	37	33	97	112	10	102	2	4	39.6
2020	1	37	33	97	112	15	95	2	4	43.9
2020	1	37	33	97	112	6	94	2	4	46.9
2020	1	37	33	97	112	12	114	2	4	93.9
2018	2	37	30	73	88	15	49	1	3	6.5
2018	2	37	30	73	88	15	59	1	3	7.2
2018	2	37	30	73	88	15	53	1	3	7.4
2018	2	37	30	73	88	16	61	1	3	12.9
2018	2	37	30	73	88	15	61	1	3	19.9
2020	2	37	34	97	112	13	90	1.5	4	24
2020	2	37	34	97	112	13	101	1.5	4	27.9
2020	2	37	34	97	112	13	95	1.5	4	31.7
2020	2	37	34	97	112	13	99	1.5	4	43.3
2020	2	37	34	97	112	10	102	1.5	4	58.2
2020	3	37	54	91	106	17	97	1	3	17.3
2020	3	37	54	91	106	10	91	1	3	23.1
2020	3	37	54	91	106	14	92	1	3	28.2
2020	3	37	54	91	106	10	87	1	3	28.9
2020	3	37	54	91	106	10	105	1	3	35.7
2018	1	38	32	146	161	10	114	2.5	3	20.7
2018	1	38	32	146	161	12	109	2.5	3	31.1
2018	1	38	32	146	161	10	108	2.5	3	38.2
2018	1	38	32	146	161	15	127	2.5	3	43.3
2018	1	38	32	146	161	12	118	2.5	3	48
2019	1	38	43	113	128	26	127	2.5	3.5	13.3
2019	1	38	43	113	128	13	121	2.5	3.5	19.1
2019	1	38	43	113	128	12	193	2.5	3.5	19.1
2019	1	38	43	113	128	13	82	2.5	3.5	24.5
2019	1	38	43	113	128	10	183	2.5	3.5	54.2
2020	1	38	33	97	112	14	90	2	3	11.7
2020	1	38	33	97	112	9	97	2	3	15.5
2020	1	38	33	97	112	8	67	2	3	19.1
2020	1	38	33	97	112	10	78	2	3	27.6
2020	1	38	33	97	112	11	91	2	3	29.8
2018	2	38	31	76	91	18	70	1.5	3	14
2018	2	38	31	76	91	14	81	1.5	3	15.4
2018	2	38	31	76	91	17	75	1.5	3	17
2018	2	38	31	76	91	17	70	1.5	3	22.5
2018	2	38	31	76	91	15	76	1.5	3	24
2019	3	38	57	108	123	15	89	1	5	48.5
2019	3	38	57	108	123	13	89	1	5	68.1
2019	3	38	57	108	123	16	82	1	5	68.4
2019	3	38	57	108	123	17	78	1	5	74.5
2019	3	38	57	108	123	15	85	1	5	76.8
2020	3	38	54	91	106	13	95	3	2.5	29.6
2020	3	38	54	91	106	19	120	3	2.5	45.7
2020	3	38	54	91	106	8	90	3	2.5	47.9
2020	3	38	54	91	106	11	114	3	2.5	49.6
2020	3	38	54	91	106	7	111	3	2.5	51.6
2019	7	38	28	103	118	8	66	1.5	3.5	20
2019	7	38	28	103	118	11	82	1.5	3.5	29.5
2019	7	38	28	103	118	6	66	1.5	3.5	30.5
2019	7	38	28	103	118	9	67	1.5	3.5	32
2019	7	38	28	103	118	4	75	1.5	3.5	44.4
2020	7	38	32	89	104	7	62	1.5	2.5	12.8
2020	7	38	32	89	104	6	68	1.5	2.5	19
2018	1	39	32	116	131	11	107	1.5	2.5	9.2
2018	1	39	32	116	131	13	89	1.5	2.5	12.3
2018	1	39	32	116	131	12	77	1.5	2.5	13.1
2018	1	39	32	116	131	12	84	1.5	2.5	21.3
2018	1	39	32	116	131	9	96	1.5	2.5	24.8
2019	1	39	44	118	133	10	63	1.5	3.5	9.5
2019	1	39	44	118	133	9	79	1.5	3.5	35.1
2019	1	39	44	118	133	9	61	1.5	3.5	39.2
2019	1	39	44	118	133	3	59	1.5	3.5	45.2
2019	1	39	44	118	133	6	58	1.5	3.5	46.4
2020	1	39	30	93	108	13	102	2.5	3.5	28.3
2020	1	39	30	93	108	13	108	2.5	3.5	41.1
2020	1	39	30	93	108	13	115	2.5	3.5	48.8
2020	1	39	30	93	108	8	112	2.5	3.5	89.8
2020	1	39	30	93	108	15	110	2.5	3.5	103.6
2018	2	39	34	98	113	13	76	1	4.5	9.7
2018	2	39	34	98	113	7	75	1	4.5	10.8
2018	2	39	34	98	113	10	62	1	4.5	13.1
2018	2	39	34	98	113	9	66	1	4.5	14.3
2018	2	39	34	98	113	8	75	1	4.5	27.4
2019	2	39	36	108	123	16	97	2	3	22.9
2019	2	39	36	108	123	19	96	2	3	32.5
2019	2	39	36	108	123	19	100	2	3	40.7
2019	2	39	36	108	123	11	89	2	3	41.7
2019	2	39	36	108	123	10	85	2	3	54.2
2020	2	39	37	104	119	11	87	1.5	3.5	22.6
2020	2	39	37	104	119	10	83	1.5	3.5	41.2
2020	2	39	37	104	119	9	75	1.5	3.5	41.6
2020	2	39	37	104	119	10	92	1.5	3.5	47.9
2020	2	39	37	104	119	8	85	1.5	3.5	50.2
2019	3	39	52	115	130	11	89	1	5	35.6
2019	3	39	52	115	130	17	84	1	5	43.8
2019	3	39	52	115	130	14	87	1	5	69.1
2019	3	39	52	115	130	16	82	1	5	91.7
2019	3	39	52	115	130	19	80	1	5	114
2020	3	39	57	96	111	8	123	3	3	12.3
2020	3	39	57	96	111	12	130	3	3	20.6
2020	3	39	57	96	111	10	86	3	3	31.1
2020	3	39	57	96	111	11	105	3	3	43.2
2020	3	39	57	96	111	15	79	3	3	51.2
2019	2	40	36	108	123	11	95	3	3	16.4
2019	2	40	36	108	123	8	97	3	3	18.3
2019	2	40	36	108	123	15	95	3	3	28
2019	2	40	36	108	123	13	97	3	3	33.2
2019	2	40	36	108	123	14	89	3	3	74.4
2020	2	40	34	98	113	17	105	1.5	4.5	34.2
2020	2	40	34	98	113	15	93	1.5	4.5	34.4
2020	2	40	34	98	113	16	97	1.5	4.5	60.7
2020	2	40	34	98	113	10	99	1.5	4.5	64
2020	2	40	34	98	113	16	94	1.5	4.5	71.9
2018	5	40	32	104	119	10	55	1	3	3.2
2018	5	40	32	104	119	12	52	1	3	5.4
2018	5	40	32	104	119	15	60	1	3	8.1
2018	5	40	32	104	119	12	69	1	3	8.5
2018	5	40	32	104	119	11	54	1	3	10.7
2019	5	40	34	103	118	5	53	1.5	3.5	16.1
2019	5	40	34	103	118	6	60	1.5	3.5	19.6
2019	5	40	34	103	118	7	57	1.5	3.5	25.9
2019	5	40	34	103	118	12	73	1.5	3.5	32.5
2019	5	40	34	103	118	5	61	1.5	3.5	52
2020	5	40	31	95	110	12	85	1.5	2.5	9.4
2020	5	40	31	95	110	10	79	1.5	2.5	17.8
2020	5	40	31	95	110	13	73	1.5	2.5	27.6
2020	5	40	31	95	110	11	72	1.5	2.5	31.4
2018	7	40	30	95	110	11	57	1	3	5.6
2018	7	40	30	95	110	15	58	1	3	7.3
2018	7	40	30	95	110	8	58	1	3	10.8
2018	7	40	30	95	110	12	56	1	3	13.1
2018	7	40	30	95	110	8	62	1	3	13.1
2020	10	40	34	71	86	6	91	3	2.5	18.3
2020	10	40	34	71	86	12	88	3	2.5	18.7
2020	10	40	34	71	86	14	90	3	2.5	37.2
2020	10	40	34	71	86	15	96	3	2.5	40.9
2020	10	40	34	71	86	13	81	3	2.5	49.4
2018	1	41	32	142	157	14	77	1.5	3.5	12
2018	1	41	32	142	157	28	100	1.5	3.5	12
2018	1	41	32	142	157	20	128	1.5	3.5	16.6
2018	1	41	32	142	157	16	107	1.5	3.5	20.1
2018	1	41	32	142	157	8	101	1.5	3.5	25.6
2019	1	41	39	121	136	12	69	1	4	8.9
2019	1	41	39	121	136	16	69	1	4	9
2019	1	41	39	121	136	16	67	1	4	14.9
2019	1	41	39	121	136	10	65	1	4	16.8
2019	1	41	39	121	136	6	59	1	4	23.2
2020	1	41	46	110	125	11	103	2.5	3	44.9
2020	1	41	46	110	125	12	104	2.5	3	49
2020	1	41	46	110	125	8	105	2.5	3	60.6
2020	1	41	46	110	125	5	117	2.5	3	103.6
2020	1	41	46	110	125	8	103	2.5	3	104.5
2018	2	41	30	76	91	18	63	1.5	3.5	10.2
2018	2	41	30	76	91	18	66	1.5	3.5	18.9
2018	2	41	30	76	91	18	75	1.5	3.5	19.4
2018	2	41	30	76	91	18	68	1.5	3.5	23.9
2018	2	41	30	76	91	14	72	1.5	3.5	25.1
2019	2	41	41	115	130	16	90	1.5	2.5	13.2
2019	2	41	41	115	130	15	88	1.5	2.5	15.8
2019	2	41	41	115	130	20	91	1.5	2.5	18.1
2019	2	41	41	115	130	24	94	1.5	2.5	27
2019	2	41	41	115	130	17	83	1.5	2.5	40.8
2020	2	41	37	104	119	20	93	1.5	4	35.8
2020	2	41	37	104	119	17	97	1.5	4	41.3
2020	2	41	37	104	119	8	109	1.5	4	44.9
2020	2	41	37	104	119	15	101	1.5	4	58.9
2020	2	41	37	104	119	12	95	1.5	4	93
2019	3	41	56	113	128	10	69	1	5	57.7
2019	3	41	56	113	128	12	71	1	5	80
2019	3	41	56	113	128	10	73	1	5	83.8
2019	3	41	56	113	128	13	74	1	5	100.3
2019	3	41	56	113	128	14	59	1	5	158.1
2020	3	41	50	87	102	10	110	2.5	3	24.5
2020	3	41	50	87	102	14	104	2.5	3	34
2020	3	41	50	87	102	15	114	2.5	3	41.9
2020	3	41	50	87	102	13	110	2.5	3	47.5
2020	3	41	50	87	102	10	102	2.5	3	67.2
2018	1	42	35	142	157	17	104	2.5	3	14.7
2018	1	42	35	142	157	15	110	2.5	3	17.2
2018	1	42	35	142	157	8	113	2.5	3	17.5
2018	1	42	35	142	157	14	109	2.5	3	22.6
2018	1	42	35	142	157	6	122	2.5	3	29.3
2019	1	42	39	117	132	14	69	1.5	4	10.9
2019	1	42	39	117	132	14	101	1.5	4	14.9
2019	1	42	39	117	132	14	122	1.5	4	15.7
2019	1	42	39	117	132	21	104	1.5	4	19.3
2019	1	42	39	117	132	18	94	1.5	4	24.7
2020	1	42	46	110	125	12	61	1	2.5	20.1
2020	1	42	46	110	125	8	68	1	2.5	20.7
2020	1	42	46	110	125	11	66	1	2.5	28.6
2020	1	42	46	110	125	7	71	1	2.5	38
2018	2	42	30	73	88	14	54	1	2.5	7.9
2018	2	42	30	73	88	17	54	1	2.5	8.2
2018	2	42	30	73	88	2	58	1	2.5	8.3
2018	2	42	30	73	88	12	55	1	2.5	11.5
2018	2	42	30	73	88	13	55	1	2.5	12.1
2019	2	42	29	106	111	12	71	2	2.5	13.1
2019	2	42	29	106	111	16	84	2	2.5	13.2
2019	2	42	29	106	111	12	79	2	2.5	14.5
2019	2	42	29	106	111	10	76	2	2.5	21.9
2019	2	42	29	106	111	10	78	2	2.5	23.5
2020	2	42	36	98	113	14	93	1.5	4	38.7
2020	2	42	36	98	113	15	102	1.5	4	39.3
2020	2	42	36	98	113	12	116	1.5	4	51.5
2020	2	42	36	98	113	13	98	1.5	4	52.3
2020	2	42	36	98	113	12	95	1.5	4	60.5
2019	3	42	52	108	123	9	45	1	3	49.7
2019	3	42	52	108	123	6	49	1	3	62.3
2019	3	42	52	108	123	7	54	1	3	77.5
2020	3	42	53	87	102	12	91	3	3.5	23
2020	3	42	53	87	102	13	102	3	3.5	36.5
2020	3	42	53	87	102	15	106	3	3.5	38.3
2020	3	42	53	87	102	20	98	3	3.5	41.5
2020	3	42	53	87	102	16	87	3	3.5	62.7
2018	1	43	35	116	131	8	107	2.5	2.5	17
2018	1	43	35	116	131	10	104	2.5	2.5	19.4
2018	1	43	35	116	131	11	87	2.5	2.5	21.4
2018	1	43	35	116	131	10	111	2.5	2.5	22
2018	1	43	35	116	131	9	108	2.5	2.5	23
2019	1	43	43	113	128	11	64	1.5	4	12.6
2019	1	43	43	113	128	19	79	1.5	4	18.9
2019	1	43	43	113	128	17	125	1.5	4	28.9
2019	1	43	43	113	128	13	114	1.5	4	29.9
2019	1	43	43	113	128	15	112	1.5	4	36
2020	1	43	36	102	117	10	103	3	2.5	21.2
2020	1	43	36	102	117	12	123	3	2.5	27
2020	1	43	36	102	117	16	103	3	2.5	38.8
2020	1	43	36	102	117	10	110	3	2.5	46.8
2020	1	43	36	102	117	14	113	3	2.5	61.6
2018	2	43	34	100	115	12	73	1.5	4.5	11.1
2018	2	43	34	100	115	14	78	1.5	4.5	11.9
2018	2	43	34	100	115	14	76	1.5	4.5	16.9
2018	2	43	34	100	115	12	69	1.5	4.5	31.9
2018	2	43	34	100	115	8	75	1.5	4.5	39
2019	2	43	32	113	128	13	97	2	3	43.5
2019	2	43	32	113	128	11	95	2	3	47.1
2019	2	43	32	113	128	16	96	2	3	61.1
2019	2	43	32	113	128	17	96	2	3	63.3
2019	2	43	32	113	128	18	94	2	3	82
2020	2	43	35	94	109	11	104	1.5	4	15.2
2020	2	43	35	94	109	14	95	1.5	4	23
2020	2	43	35	94	109	12	101	1.5	4	28.1
2020	2	43	35	94	109	14	107	1.5	4	31.3
2020	2	43	35	94	109	16	96	1.5	4	46.1
2020	3	43	54	89	104	15	98	3	2	42.4
2020	3	43	54	89	104	9	103	3	2	43.3
2020	3	43	54	89	104	17	104	3	2	43.9
2020	3	43	54	89	104	8	106	3	2	68.3
2020	3	43	54	89	104	13	114	3	2	76.9
2018	1	44	32	104	119	25	86	3.5	3.5	9.8
2018	1	44	32	104	119	17	85	3.5	3.5	10.4
2018	1	44	32	104	119	21	100	3.5	3.5	16.3
2018	1	44	32	104	119	17	101	3.5	3.5	27.2
2018	1	44	32	104	119	30	106	3.5	3.5	32
2019	1	44	41	113	128	13	110	1.5	4.5	16.7
2019	1	44	41	113	128	15	99	1.5	4.5	23.5
2019	1	44	41	113	128	8	58	1.5	4.5	33.1
2019	1	44	41	113	128	2	116	1.5	4.5	33.3
2019	1	44	41	113	128	5	87	1.5	4.5	35.4
2020	1	44	41	105	120	16	132	3	3	22.8
2020	1	44	41	105	120	21	129	3	3	25.9
2020	1	44	41	105	120	10	116	3	3	60.2
2020	1	44	41	105	120	17	130	3	3	64.4
2020	1	44	41	105	120	18	116	3	3	72.3
2018	2	44	34	100	115	12	66	1	5	8.9
2018	2	44	34	100	115	9	79	1	5	14.1
2018	2	44	34	100	115	10	74	1	5	15.3
2018	2	44	34	100	115	9	71	1	5	39.9
2018	2	44	34	100	115	10	63	1	5	49.4
2019	2	44	30	103	118	10	62	2	2	13.8
2019	2	44	30	103	118	12	74	2	2	18.1
2019	2	44	30	103	118	9	69	2	2	19.3
2019	2	44	30	103	118	8	60	2	2	25.5
2019	2	44	30	103	118	6	65	2	2	29.8
2020	2	44	35	103	118	23	95	1.5	4	28.3
2020	2	44	35	103	118	22	96	1.5	4	31.9
2020	2	44	35	103	118	13	103	1.5	4	44.3
2020	2	44	35	103	118	16	99	1.5	4	47.9
2020	2	44	35	103	118	13	96	1.5	4	54.2
2019	3	44	56	113	128	12	83	1	5	25.5
2019	3	44	56	113	128	11	78	1	5	27.5
2019	3	44	56	113	128	17	86	1	5	27.8
2019	3	44	56	113	128	15	85	1	5	31.2
2019	3	44	56	113	128	11	85	1	5	38
2020	3	44	57	93	108	11	93	3	2	27.6
2020	3	44	57	93	108	14	70	3	2	40.9
2020	3	44	57	93	108	7	78	3	2	54.9
2020	3	44	57	93	108	12	67	3	2	57.3
2020	3	44	57	93	108	10	82	3	2	81.7
2018	1	45	32	113	128	17	92	2.5	2.5	6.8
2018	1	45	32	113	128	25	101	2.5	2.5	7.6
2018	1	45	32	113	128	14	105	2.5	2.5	15.8
2018	1	45	32	113	128	14	101	2.5	2.5	16.1
2018	1	45	32	113	128	7	97	2.5	2.5	16.6
2019	1	45	30	111	126	18	97	2.5	3.5	18
2019	1	45	30	111	126	17	97	2.5	3.5	21
2019	1	45	30	111	126	15	108	2.5	3.5	22.1
2019	1	45	30	111	126	4	93	2.5	3.5	30
2019	1	45	30	111	126	6	98	2.5	3.5	34.7
2020	1	45	36	103	118	13	95	2	3	35.6
2020	1	45	36	103	118	12	93	2	3	45.6
2020	1	45	36	103	118	10	99	2	3	49.4
2020	1	45	36	103	118	13	83	2	3	53.7
2020	1	45	36	103	118	19	110	2	3	60.4
2018	2	45	32	95	110	10	56	1.5	2.5	9.6
2018	2	45	32	95	110	10	53	1.5	2.5	10.4
2018	2	45	32	95	110	12	62	1.5	2.5	10.6
2018	2	45	32	95	110	10	45	1.5	2.5	13.5
2018	2	45	32	95	110	16	63	1.5	2.5	21.3
2019	2	45	31	113	128	7	94	2	3	24.3
2019	2	45	31	113	128	8	94	2	3	28.7
2019	2	45	31	113	128	9	87	2	3	51.6
2019	2	45	31	113	128	6	88	2	3	51.6
2019	2	45	31	113	128	6	88	2	3	53.8
2020	2	45	37	98	113	13	101	2	3.5	13.1
2020	2	45	37	98	113	17	104	2	3.5	23.3
2020	2	45	37	98	113	11	105	2	3.5	27.6
2020	2	45	37	98	113	12	84	2	3.5	50.2
2020	2	45	37	98	113	12	86	2	3.5	51.4
2019	8	45	53	113	128	7	57	1	4	68.2
2019	8	45	53	113	128	11	47	1	4	70.6
2019	8	45	53	113	128	8	59	1	4	72.1
2019	8	45	53	113	128	3	59	1	4	78.6
2019	8	45	53	113	128	12	53	1	4	86.2
2020	8	45	50	83	98	10	77	1.5	3.5	32.5
2020	8	45	50	83	98	14	84	1.5	3.5	32.7
2020	8	45	50	83	98	7	74	1.5	3.5	33.2
2020	8	45	50	83	98	12	80	1.5	3.5	34.8
2020	8	45	50	83	98	13	74	1.5	3.5	59.8
2018	2	46	37	100	110	18	69	1	3.5	9.7
2018	2	46	37	100	110	15	69	1	3.5	11.8
2018	2	46	37	100	110	19	77	1	3.5	12.5
2018	2	46	37	100	110	15	73	1	3.5	13.3
2018	2	46	37	100	110	15	79	1	3.5	20.3
2019	2	46	37	115	130	12	92	1.5	4	14.1
2019	2	46	37	115	130	16	85	1.5	4	14.2
2019	2	46	37	115	130	21	88	1.5	4	21.1
2019	2	46	37	115	130	19	90	1.5	4	22
2019	2	46	37	115	130	12	84	1.5	4	28.6
2020	2	46	38	104	119	14	103	1.5	4	35.7
2020	2	46	38	104	119	12	91	1.5	4	48.2
2020	2	46	38	104	119	15	103	1.5	4	52.3
2020	2	46	38	104	119	20	106	1.5	4	81.3
2020	2	46	38	104	119	18	100	1.5	4	87.6
2019	3	46	56	113	128	16	88	1.5	4.5	31.3
2019	3	46	56	113	128	17	88	1.5	4.5	35
2019	3	46	56	113	128	21	80	1.5	4.5	37.5
2019	3	46	56	113	128	13	97	1.5	4.5	39.6
2019	3	46	56	113	128	12	101	1.5	4.5	39.8
2020	3	46	65	100	115	12	138	3.5	4	15.7
2020	3	46	65	100	115	17	131	3.5	4	20.2
2020	3	46	65	100	115	14	133	3.5	4	20.7
2020	3	46	65	100	115	13	146	3.5	4	44.8
2020	3	46	65	100	115	15	130	3.5	4	57.9
2018	10	46	35	95	110	20	75	2	4	14.1
2018	10	46	35	95	110	16	85	2	4	14.4
2018	10	46	35	95	110	19	81	2	4	14.5
2018	10	46	35	95	110	20	81	2	4	16.8
2018	10	46	35	95	110	18	77	2	4	19.4
2019	10	46	32	103	118	14	72	1	4.5	12
2019	10	46	32	103	118	16	81	1	4.5	12.5
2019	10	46	32	103	118	13	72	1	4.5	13.7
2019	10	46	32	103	118	14	73	1	4.5	23.8
2019	10	46	32	103	118	15	80	1	4.5	23.9
2020	10	46	33	100	115	21	88	1.5	3	13.5
2020	10	46	33	100	115	21	88	1.5	3	15.5
2020	10	46	33	100	115	14	86	1.5	3	19.4
2020	10	46	33	100	115	10	89	1.5	3	40.5
2020	10	46	33	100	115	13	90	1.5	3	41.7
2018	1	47	35	142	157	15	76	1.5	3.5	18.8
2018	1	47	35	142	157	8	101	1.5	3.5	19.7
2018	1	47	35	142	157	13	111	1.5	3.5	22.5
2018	1	47	35	142	157	13	100	1.5	3.5	25.3
2018	1	47	35	142	157	11	97	1.5	3.5	43
2019	1	47	32	113	128	7	81	3.5	3.5	10.3
2019	1	47	32	113	128	9	100	3.5	3.5	16.2
2019	1	47	32	113	128	16	114	3.5	3.5	17.4
2019	1	47	32	113	128	7	91	3.5	3.5	26.2
2019	1	47	32	113	128	8	102	3.5	3.5	35.9
2020	1	47	47	110	125	7	145	3.5	2.5	25.5
2020	1	47	47	110	125	15	129	3.5	2.5	27.5
2020	1	47	47	110	125	12	141	3.5	2.5	28.1
2020	1	47	47	110	125	8	148	3.5	2.5	30.1
2020	1	47	47	110	125	7	128	3.5	2.5	64.8
2018	2	47	32	95	110	12	64	1	2.5	8.6
2018	2	47	32	95	110	12	68	1	2.5	8.9
2018	2	47	32	95	110	19	66	1	2.5	15.2
2018	2	47	32	95	110	11	70	1	2.5	16.9
2018	2	47	32	95	110	9	67	1	2.5	32.6
2019	3	47	57	119	134	9	88	1.5	4.5	27.3
2019	3	47	57	119	134	16	79	1.5	4.5	31.7
2019	3	47	57	119	134	9	86	1.5	4.5	33.3
2019	3	47	57	119	134	17	94	1.5	4.5	40
2019	3	47	57	119	134	9	78	1.5	4.5	103.5
2020	3	47	50	82	97	17	107	3	4	17.6
2020	3	47	50	82	97	12	112	3	4	22.1
2020	3	47	50	82	97	15	92	3	4	27.8
2020	3	47	50	82	97	18	91	3	4	42
2020	3	47	50	82	97	12	120	3	4	55.6
2019	11	47	44	110	125	18	65	2	4.5	13.3
2019	11	47	44	110	125	16	62	2	4.5	15.5
2019	11	47	44	110	125	17	66	2	4.5	19.8
2019	11	47	44	110	125	18	67	2	4.5	21.8
2019	11	47	44	110	125	15	63	2	4.5	37.2
2020	11	47	42	104	119	12	80	2	4	27.1
2020	11	47	42	104	119	20	82	2	4	32.1
2020	11	47	42	104	119	14	81	2	4	40.6
2020	11	47	42	104	119	16	74	2	4	51.3
2020	11	47	42	104	119	13	69	2	4	60.4
2018	1	48	32	115	130	14	82	1.5	3.5	10.3
2018	1	48	32	115	130	12	86	1.5	3.5	14.2
2018	1	48	32	115	130	15	83	1.5	3.5	14.5
2018	1	48	32	115	130	13	86	1.5	3.5	16
2018	1	48	32	115	130	15	95	1.5	3.5	25.8
2019	1	48	32	123	138	17	82	1.5	4	14.9
2019	1	48	32	123	138	19	92	1.5	4	25.6
2019	1	48	32	123	138	14	134	1.5	4	28.7
2019	1	48	32	123	138	14	113	1.5	4	30.6
2019	1	48	32	123	138	16	117	1.5	4	37.4
2020	1	48	39	104	119	12	131	3	3	16.7
2020	1	48	39	104	119	7	138	3	3	20.4
2020	1	48	39	104	119	11	139	3	3	28.3
2020	1	48	39	104	119	10	128	3	3	29.1
2020	1	48	39	104	119	10	119	3	3	56.8
2018	2	48	30	76	91	10	74	1	3	14
2018	2	48	30	76	91	14	88	1	3	15.2
2018	2	48	30	76	91	15	83	1	3	19.9
2018	2	48	30	76	91	11	72	1	3	20.5
2018	2	48	30	76	91	11	89	1	3	30.9
2019	2	48	30	96	111	12	85	1.5	4	15.9
2019	2	48	30	96	111	16	81	1.5	4	18.5
2019	2	48	30	96	111	10	80	1.5	4	19.4
2019	2	48	30	96	111	13	84	1.5	4	19.9
2019	2	48	30	96	111	14	86	1.5	4	22
2020	2	48	36	98	113	14	95	1.5	3.5	24.8
2020	2	48	36	98	113	10	85	1.5	3.5	34.7
2020	2	48	36	98	113	10	93	1.5	3.5	36.6
2020	2	48	36	98	113	15	97	1.5	3.5	44.6
2020	2	48	36	98	113	12	87	1.5	3.5	45.6
2019	3	48	56	113	128	19	85	1.5	4.5	34.9
2019	3	48	56	113	128	13	86	1.5	4.5	36.8
2019	3	48	56	113	128	12	87	1.5	4.5	44.2
2019	3	48	56	113	128	16	82	1.5	4.5	44.9
2019	3	48	56	113	128	14	83	1.5	4.5	50.7
2020	3	48	54	87	102	14	104	2.5	4	17.4
2020	3	48	54	87	102	10	106	2.5	4	26.4
2020	3	48	54	87	102	6	112	2.5	4	47.3
2020	3	48	54	87	102	9	107	2.5	4	51.1
2020	3	48	54	87	102	11	116	2.5	4	52.2
2018	1	49	32	119	134	22	110	2	3	10.1
2018	1	49	32	119	134	15	94	2	3	13.1
2018	1	49	32	119	134	13	101	2	3	17.3
2018	1	49	32	119	134	15	106	2	3	19.2
2018	1	49	32	119	134	22	108	2	3	26.7
2019	1	49	32	123	138	20	115	1.5	4	18.3
2019	1	49	32	123	138	13	80	1.5	4	26
2019	1	49	32	123	138	19	86	1.5	4	28
2019	1	49	32	123	138	15	127	1.5	4	32.2
2019	1	49	32	123	138	13	112	1.5	4	43.7
2020	1	49	49	112	127	10	100	2	3	20.2
2020	1	49	49	112	127	14	95	2	3	27
2020	1	49	49	112	127	21	95	2	3	43.4
2020	1	49	49	112	127	21	87	2	3	47.8
2020	1	49	49	112	127	15	93	2	3	56.1
2018	2	49	34	98	113	15	72	1	4	9.9
2018	2	49	34	98	113	15	81	1	4	12.9
2018	2	49	34	98	113	9	72	1	4	13.4
2018	2	49	34	98	113	14	78	1	4	19.4
2018	2	49	34	98	113	14	88	1	4	40.1
2019	2	49	29	96	111	6	66	1.5	3	16.9
2019	2	49	29	96	111	9	64	1.5	3	37.7
2019	2	49	29	96	111	8	70	1.5	3	41.8
2019	2	49	29	96	111	7	70	1.5	3	61.4
2019	2	49	29	96	111	11	68	1.5	3	73.9
2020	2	49	36	103	118	9	120	2	3.5	23.1
2020	2	49	36	103	118	10	108	2	3.5	33
2020	2	49	36	103	118	24	99	2	3.5	34.3
2020	2	49	36	103	118	17	93	2	3.5	35.6
2020	2	49	36	103	118	17	105	2	3.5	46.7
2020	3	49	56	89	104	4	111	2	4.5	32.4
2020	3	49	56	89	104	13	105	2	4.5	34.9
2020	3	49	56	89	104	16	112	2	4.5	37.9
2020	3	49	56	89	104	13	108	2	4.5	43.7
2020	3	49	56	89	104	12	90	2	4.5	70.3
2019	2	50	30	108	123	15	87	2.5	3	29.5
2019	2	50	30	108	123	8	89	2.5	3	33.5
2019	2	50	30	108	123	12	86	2.5	3	62.1
2019	2	50	30	108	123	8	85	2.5	3	92.1
2020	2	50	36	98	113	14	105	2	4	25.2
2020	2	50	36	98	113	10	106	2	4	34.7
2020	2	50	36	98	113	12	102	2	4	47
2020	2	50	36	98	113	20	91	2	4	52.3
2020	2	50	36	98	113	15	99	2	4	74.2
2019	9	50	41	111	126	17	74	1	3.5	14.8
2019	9	50	41	111	126	16	57	1	3.5	17.2
2019	9	50	41	111	126	14	63	1	3.5	17.4
2019	9	50	41	111	126	14	51	1	3.5	21.4
2019	9	50	51	108	123	13	67	1	4	28.1
2019	9	50	41	111	126	10	48	1	3.5	28.8
2019	9	50	51	108	123	12	59	1	4	70.5
2019	9	50	51	108	123	14	64	1	4	75
2019	9	50	51	108	123	10	54	1	4	91.7
2019	9	50	51	108	123	7	65	1	4	92.6
2020	9	50	41	77	92	10	79	3.5	2	23.9
2020	9	50	41	77	92	12	93	3.5	2	24.3
2020	9	50	44	107	122	18	81	1.5	4	25.7
2020	9	50	44	107	122	18	77	1.5	4	26.5
2020	9	50	41	77	92	7	93	3.5	2	26.7
2020	9	50	44	107	122	16	86	1.5	4	32.4
2020	9	50	41	77	92	9	74	3.5	2	34.1
2020	9	50	44	107	122	11	88	1.5	4	36.8
2020	9	50	44	107	122	10	74	1.5	4	55.5
2020	9	50	41	77	92	5	71	3.5	2	65.1
2018	10	50	34	76	91	17	71	1	2.5	8.8
2018	10	50	34	76	91	14	69	1	2.5	9
2018	10	50	34	76	91	23	70	1	2.5	9.5
2018	10	50	34	76	91	13	74	1	2.5	10.6
2018	10	50	34	76	91	21	78	1	2.5	15.5
2018	11	50	14	104	119	12	73	1	3.5	12.7
2018	11	50	14	104	119	24	76	1	3.5	12.8
2018	11	50	14	104	119	15	73	1	3.5	13.6
2018	11	50	14	104	119	15	78	1	3.5	14.6
2018	11	50	14	104	119	16	79	1	3.5	14.7
2020	1	51	47	109	124	31	129	2.5	2.5	19.6
2020	1	51	47	109	124	15	129	2.5	2.5	26.8
2020	1	51	47	109	124	16	141	2.5	2.5	38.8
2020	1	51	47	109	124	20	119	2.5	2.5	39.3
2020	1	51	47	109	124	8	115	2.5	2.5	40.1
2018	2	51	32	98	113	18	74	1.5	3.5	12.3
2018	2	51	32	98	113	18	73	1.5	3.5	13.2
2018	2	51	32	98	113	14	73	1.5	3.5	13.6
2018	2	51	32	98	113	16	74	1.5	3.5	17.1
2018	2	51	32	98	113	15	78	1.5	3.5	24.8
2019	2	51	30	96	111	14	75	1.5	3.5	15
2019	2	51	30	96	111	9	69	1.5	3.5	41.8
2019	2	51	30	96	111	9	70	1.5	3.5	49
2019	2	51	30	96	111	8	61	1.5	3.5	63.9
2019	2	51	30	96	111	9	48	1.5	3.5	78.4
2020	2	51	36	91	106	14	91	1.5	4.5	17.7
2020	2	51	36	91	106	17	106	1.5	4.5	24.7
2020	2	51	36	91	106	14	86	1.5	4.5	30.8
2020	2	51	36	91	106	15	97	1.5	4.5	35
2020	2	51	36	91	106	8	96	1.5	4.5	42.7
2020	3	51	58	92	107	11	112	1.5	5	22.7
2020	3	51	58	92	107	9	107	1.5	5	40.8
2020	3	51	58	92	107	17	110	1.5	5	44.6
2020	3	51	58	92	107	12	101	1.5	5	52.4
2020	3	51	58	92	107	9	85	1.5	5	53.7
2018	2	52	30	76	91	15	57	1	2.5	5.6
2018	2	52	30	76	91	8	61	1	2.5	11.4
2018	2	52	30	76	91	14	78	1	2.5	14.5
2018	2	52	30	76	91	11	64	1	2.5	15.6
2018	2	52	30	76	91	18	65	1	2.5	17
2019	2	52	33	115	130	12	87	1	3	28.9
2019	2	52	33	115	130	13	87	1	3	58.8
2019	2	52	33	115	130	9	81	1	3	60.6
2019	2	52	33	115	130	10	82	1	3	66.9
2019	2	52	33	115	130	12	71	1	3	72.1
2020	2	52	34	103	118	8	107	1.5	4	38.2
2020	2	52	34	103	118	18	104	1.5	4	38.7
2020	2	52	34	103	118	9	99	1.5	4	55.6
2020	2	52	34	103	118	13	115	1.5	4	66.9
2020	2	52	34	103	118	13	112	1.5	4	70.1
2019	3	52	56	115	130	16	90	1.5	4.5	46.2
2019	3	52	56	115	130	18	74	1.5	4.5	59.5
2019	3	52	56	115	130	16	83	1.5	4.5	59.8
2019	3	52	56	115	130	6	71	1.5	4.5	71.3
2019	3	52	56	115	130	14	87	1.5	4.5	86.8
2020	3	52	52	85	100	10	72	2	3	21.3
2020	3	52	52	85	100	10	60	2	3	29.5
2020	3	52	52	85	100	10	86	2	3	33.4
2020	3	52	52	85	100	12	79	2	3	36.8
2020	3	52	52	85	100	10	90	2	3	38.7
2019	9	52	44	108	123	18	73	1.5	3	12.5
2019	9	52	44	108	123	16	68	1.5	3	12.6
2019	9	52	44	108	123	19	68	1.5	3	16.6
2019	9	52	44	108	123	12	69	1.5	3	19.8
2019	9	52	44	108	123	17	62	1.5	3	26.3
2020	9	52	43	107	122	15	79	1.5	3.5	16.5
2020	9	52	43	107	122	14	71	1.5	3.5	20.3
2020	9	52	43	107	122	14	69	1.5	3.5	21.6
2020	9	52	43	107	122	10	61	1.5	3.5	24.2
2020	9	52	43	107	122	17	70	1.5	3.5	28.8
2018	11	52	14	111	126	11	74	1.5	4	10.1
2018	11	52	14	111	126	21	84	1.5	4	12.6
2018	11	52	14	111	126	19	84	1.5	4	12.9
2018	11	52	14	111	126	17	81	1.5	4	19
2018	11	52	14	111	126	16	80	1.5	4	20.1
2019	1	53	33	128	143	17	92	2	3	23.9
2019	1	53	33	128	143	7	86	2	3	24.2
2019	1	53	33	128	143	11	87	2	3	27.7
2019	1	53	33	128	143	17	91	2	3	30.8
2019	1	53	33	128	143	16	90	2	3	42.2
2020	1	53	51	114	129	21	142	3	2.5	26.1
2020	1	53	51	114	129	24	142	3	2.5	28.2
2020	1	53	51	114	129	14	141	3	2.5	29.1
2020	1	53	51	114	129	25	133	3	2.5	29.3
2020	1	53	51	114	129	13	145	3	2.5	32.7
2018	2	53	30	98	113	12	72	1	3.5	11.3
2018	2	53	30	98	113	13	73	1	3.5	16.3
2018	2	53	30	98	113	14	84	1	3.5	26.5
2018	2	53	30	98	113	13	83	1	3.5	29.5
2018	2	53	30	98	113	12	75	1	3.5	30.5
2019	2	53	33	103	118	18	80	1	4	21.4
2019	2	53	33	103	118	10	91	1	4	23.6
2019	2	53	33	103	118	12	92	1	4	27.9
2019	2	53	33	103	118	10	86	1	4	32.1
2019	2	53	33	103	118	12	93	1	4	37.2
2020	2	53	36	93	108	8	92	2.5	3	25.2
2020	2	53	36	93	108	5	82	2.5	3	34
2020	2	53	36	93	108	8	90	2.5	3	46.5
2020	2	53	36	93	108	7	74	2.5	3	48
2020	2	53	36	93	108	9	79	2.5	3	69.4
2019	3	53	52	115	130	11	61	1	4	41.9
2019	3	53	52	115	130	11	53	1	4	89.5
2019	3	53	52	115	130	10	82	1	4	119.4
2020	3	53	52	85	100	10	103	2	3	15.4
2020	3	53	52	85	100	8	93	2	3	25.1
2020	3	53	52	85	100	18	92	2	3	27.8
2020	3	53	52	85	100	16	99	2	3	39
2020	3	53	52	85	100	7	93	2	3	39.3
2018	1	54	32	100	115	12	87	2	3	11.8
2018	1	54	32	100	115	21	82	2	3	18.4
2018	1	54	32	100	115	17	83	2	3	21.5
2018	1	54	32	100	115	21	89	2	3	21.8
2018	1	54	32	100	115	8	88	2	3	26
2020	1	54	44	107	122	13	116	3	2.5	16.2
2020	1	54	44	107	122	14	71	3	2.5	20.1
2020	1	54	44	107	122	17	113	3	2.5	26.1
2020	1	54	44	107	122	16	54	3	2.5	26.6
2020	1	54	44	107	122	10	113	3	2.5	48.7
2019	2	54	34	103	118	11	89	1	4.5	18.5
2019	2	54	34	103	118	12	83	1	4.5	19.4
2019	2	54	34	103	118	15	86	1	4.5	24
2019	2	54	34	103	118	12	81	1	4.5	32.5
2019	2	54	34	103	118	11	91	1	4.5	40.5
2020	2	54	35	102	117	18	83	1	4.5	27.3
2020	2	54	35	102	117	12	93	1	4.5	33.6
2020	2	54	35	102	117	12	83	1	4.5	35.2
2020	2	54	35	102	117	14	86	1	4.5	37.5
2020	2	54	35	102	117	18	92	1	4.5	40.8
2019	4	54	64	138	153	13	123	1.5	4	5.5
2019	4	54	64	138	153	15	116	1.5	4	9.1
2019	4	54	64	138	153	13	114	1.5	4	23.3
2019	4	54	64	138	153	10	112	1.5	4	28.6
2019	4	54	64	138	153	18	99	1.5	4	41.6
2020	4	54	77	121	136	10	94	1.5	5	15.8
2020	4	54	77	121	136	15	97	1.5	5	16.4
2020	4	54	77	121	136	21	116	1.5	5	16.6
2020	4	54	77	121	136	13	114	1.5	5	32.9
2020	4	54	77	121	136	16	128	1.5	5	36.6
2018	6	54	36	98	113	15	72	1	4.5	7.7
[truncated: 5,289 more rows]
